# Metabolic shift toward ketosis in asocial cavefish increases social-like collective behavior.

Motoko Iwashita<sup>1</sup>, Amity Tran<sup>1</sup>, Miki Wong<sup>2,3</sup>, Ryan Lee<sup>4,5</sup>, and Masato Yoshizawa<sup>1\*</sup>

<sup>1</sup> School of Life Sciences, the University of Hawai‘i at Mānoa, Honolulu, HI 96822, USA

<sup>2</sup> Nā Pu‘uwai Native Hawaiian Healthcare System, Kaunakakai, HI 96748, USA

<sup>3</sup> Nutrition Services Department, Shriners Hospitals for Children, Honolulu, HI 96826, USA

<sup>4</sup> Medical Staff Department, Shriners Hospitals for Children, Honolulu, HI 96826, USA

<sup>5</sup> Department of Pediatrics, University of Hawai‘i at Mānoa, Honolulu, HI 96813, USA

Corresponding author:

Masato Yoshizawa

[yoshizaw@hawaii.edu](mailto:yoshizaw@hawaii.edu)

2538 McCarthy Mall, EDM 216

Honolulu, HI 96822, USA

Keywords: Ketogenic diet, Social affinity, Collective behavior, Astyanax, Plasticity, Metabolism

Conflict of Interest: The authors declare no competing financial interests.

Acknowledgement: We thank C Balaan for constructive comments regarding insights on social-like interactions in cavefish. We are grateful to V Crystal, J Choi, L Lu, J Nguyen, VFL Fernandes, K Lactaoen, M Worsham, H Hernandez, N Doeden, J Kato, M Ito, R Balmilero-Unciano, E Doy, A Martinez, and D Mones for fish care assistance. We gratefully acknowledge supports from the National Institute of Health (P20GM125508) to MY, Hawaii Community Foundation (18CON-90818) to MY.

33 **Abstract**

34 Social affinity and collective behavior are nearly ubiquitous in the animal kingdom, but many lineages  
35 feature evolutionarily asocial species. These solitary species may have evolved to conserve energy in  
36 food-sparse environments. However, the mechanism by which metabolic changes regulate social affinity  
37 is not well investigated. In this study, we used the Mexican tetra (*Astyanax mexicanus*), which features  
38 riverine sighted surface (surface fish) and cave-dwelling populations (cavefish), to address the impact of  
39 metabolic shifts on asociality and other cave-associated behaviors in cavefish, including repetitive  
40 turning, sleeplessness, swimming longer distances, and enhanced foraging behavior. After 1 month of  
41 ketosis-inducing ketogenic diet feeding, asocial cavefish exhibited significantly higher social affinity,  
42 whereas social affinity regressed in cavefish fed the standard diet. The ketogenic diet also reduced  
43 repetitive turning and swimming in cavefish. No detectable behavioral shifts were found regarding  
44 sleeplessness and foraging behavior, suggesting that other evolved behaviors are not regulated by  
45 ketosis. We further examined the effects of the ketogenic diet via supplementation with extragenic  
46 ketone bodies, revealing that ketone bodies are pivotal molecules associated with social affinity. Our  
47 study indicated that fish that evolved to be asocial remain capable of exhibiting social affinity under  
48 ketosis.  
49

## 50 **Introduction**

51 Wild animals experience frequent fasting because of daily, seasonal, and yearly changes in food  
52 availability. Physiologically, fasting can increase the secretion of appetite-related hormones (e.g.,  
53 ghrelin, peptide Y, orexin) and induce a metabolic shift into nutritional ketosis (McCue, 2010).  
54 Concerning behavioral outputs, fasting also induces shifts including boldness in foraging involving risk-  
55 taking (Padilla et al., 2016) and a shift from avoiding to approaching prey (Filosa et al., 2016).  
56 Interestingly, fasting also induces non-foraging-related behaviors including aggression toward cohorts  
57 (Fokidis et al., 2013; Solianik et al., 2016) and engagement in social dominance (Nakajo et al., 2020).  
58 These non-foraging behaviors could be evoked by the metabolic changes that occur in a state of  
59 nutritional ketosis instead of the increased production of appetite-related hormones. However, it is not  
60 fully understood whether ketosis itself in the absence of hunger drives these non-foraging behaviors.  
61 Such knowledge will open a path to understanding the effects of different dietary intakes on changing  
62 environments, such as switching from ketosis-inducing very low-carbohydrate diets to glycolysis-  
63 inducing carbohydrate-rich diets or vice versa.

64 Recently, the ketosis-inducing ketogenic diet (KD), which contains a high amount of fat,  
65 sufficient protein, and very low amount of carbohydrates, gained popularity among humans because of  
66 its neuroprotective and anti-inflammatory effects without effects on appetite-related hormone levels  
67 (Deemer et al., 2020; Ludwig, 2020; Sumithran et al., 2013). The KD is an effective treatment for  
68 refractory seizures, and there is some evidence that it may be beneficial for other nervous system-based  
69 disorders such as Alzheimer's disease, Parkinson's disease, and autism (Lee et al., 2018; McDonald and  
70 Cervenka, 2018; Phillips et al., 2018; Ruskin and Masino, 2012). Because modern humans evolved to  
71 acquire resistance to starvation (Bellisari, 2008), our body physiology and behavioral tendencies  
72 possibly evolved to accommodate drastic metabolic changes. However, the major molecular  
73 mechanisms for these positive are largely unknown (Ludwig, 2020; Qin et al., 2021). We were therefore  
74 motivated to explore the effects of metabolic shifts, particularly from glycolysis to ketosis, on behavioral

75 outputs such as social affinity using a single species consisting of typical and starvation-resistant  
76 populations.

77 A suitable model system for this purpose is the Mexican cavefish (*Astyanax mexicanus*). *A.*  
78 *mexicanus* has emerged as a model system of diverse aspects of evolution and development, including  
79 those with relevance to human medicine, e.g., cataract formation, diabetes, albinism-related syndrome,  
80 and insomnia (Aspiras et al., 2015; Bilandžija et al., 2018, 2013; Duboué et al., 2012, 2011; Jaggard et  
81 al., 2017; Keene et al., 2016; Ma et al., 2014; McGaugh et al., 2014; Riddle et al., 2018; Rohner et al.,  
82 2013; Strickler et al., 2007). *A. mexicanus* consists of surface riverine epigeal (surface fish) and cave-  
83 dwelling hypogean (cavefish) populations. Cavefish diverged from their surface-dwelling relatives  
84 20,000–200,000 years ago (Fumey et al., 2018; Herman et al., 2018), and they have subsequently  
85 evolved many distinct morphological and behavioral phenotypes in the food-sparse cave environment,  
86 including eye regression/loss, pigment reduction, increased mechanosensory lateral line activity,  
87 adherence to vibration stimuli, sleeplessness, hyperactivity, repetitive circling, and reduced social  
88 affinity (Iwashita and Yoshizawa, 2021; Keene et al., 2016; Yoshizawa, 2015; Yoshizawa et al., 2018).  
89 Compared to cavefish, surface fish exhibit typical teleost phenotypes, including typical eyed and  
90 pigmented morphologies, no strong adherence to vibration stimuli, nocturnal sleep patterns, and social  
91 affinity. Many cavefish traits are believed to have evolved to adapt to food-sparse dark environments.  
92 Indeed, wild cavefish were estimated to be exposed to approximately 6 months of food-sparse conditions  
93 annually (Espinasa et al., 2021), and they are likely to have the ability to withstand starvation via  
94 increased fat storage (Aspiras et al., 2015), slower weight loss during starvation (Huppopp, 1986),  
95 reduced energy-costing circadian activities, and lack of eyes (Moran et al., 2015, 2014).

96 Concerning social-like behavior, cavefish exhibit no detectable schooling behavior (Kowalko et  
97 al., 2013; Patch et al., 2020; Pierre et al., 2020) or hierarchical dominance (Elipot et al., 2013). By  
98 contrast, surface fish school/shoal with cohorts and model fish (Kowalko et al., 2013) exhibit group  
99 hierarchical dominance (Elipot et al., 2013). Because social behaviors in many fish (e.g., zebrafish) are

100 promoted by visual stimuli, blind cavefish might not express social-like activities because of the absence  
101 of visual acuity. However, a recent detailed study illustrated that surface fish exhibit a high level of  
102 social-like nearby interactions (one-by-one affinity) in the dark, and these of which were promoted by  
103 mechanosensory lateral line inputs (Iwashita and Yoshizawa, 2021). Interestingly, blind cavefish  
104 displayed much lower levels, albeit significant, of nearby interactions than surface fish (Iwashita and  
105 Yoshizawa, 2021). Further, cavefish exhibited plasticity in the level of nearby interactions in which they  
106 increased plasticity in a familiar environment in comparison with an unfamiliar environment (Iwashita  
107 and Yoshizawa, 2021), which is similar to the findings in patients with autism (Helt et al., 2020; Runco  
108 et al., 1986).

109 Thus far, similarities between cavefish and patients with autism have been investigated in terms  
110 of gene regulation- and innate behavior-profiles. First, the cavefish gene expression profile is closer to  
111 that of patients with autism than to that of other known model systems (cavefish and surface fish  
112 transcriptomes exhibited the same directional gene expression changes observed in the brains of patients  
113 with autism [ $>58.5\%$  of 3152 cavefish orthologs]). Conversely, other proxy systems (BTBR mice  
114 [classic autism model] and *shank3* knockout mice) exhibit much less overlap ( $<11\%$ ) (Lee et al., 2019;  
115 Provenzano et al., 2016; Yoshizawa et al., 2018). Second, cavefish's evolved behaviors—asociality,  
116 repetitive behavior, sleeplessness, higher swimming activity, adherence to a particular vibration  
117 stimulus, and higher anxiety-related plasma cortisol levels—are similar to those in patients with autism  
118 (Yoshizawa et al., 2018). Third, cavefish and human ancestors are starvation-resistant, and they could  
119 share some metabolic pathways (Aspiras et al., 2015; Bellisari, 2008; Huppopp, 1986; Riddle et al.,  
120 2018). These similarities and a fact that KD feeding increases sociality in patients with autism  
121 (Evangelidou et al., 2003; Lee et al., 2018; Li et al., 2021; Napoli et al., 2014) prompted us to study the  
122 effects of ketosis on social affinity in asocial cavefish.

123 In this study, we assessed the effects of the KD on an evolutionarily asocial cave population of *A.*  
124 *mexicanus*. The time-course experiment revealed that 1 month of KD feeding promoted and sustained

125 the juvenile level of nearby interactions, whereas control diet (CD)-fed cavefish exhibited diminished  
126 nearby interactions. KD feeding also reduced repetitive turning and swimming activity, which are the  
127 hallmarks of the autism-like condition. However, the effects of the KD were limited. For example,  
128 sleeplessness and high adherence to a particular vibrating stimulus were not detectably changed under  
129 the 1-month KD treatment. To reveal the molecular basis of the effects of the KD, we provided  
130 supplementation with a major ketone body, beta-hydroxybutyrate (BHB). This experiment indicated that  
131 BHB supplementation promoted nearby interactions and reduced repetitive turning, covering the major  
132 effect of the KD.

133 Overall, ketosis appears to be capable of significantly shifting the asociality of evolved cavefish  
134 toward the surface fish phenotype, providing new insights into the contribution of the diet to the  
135 evolution of behavior.

136

## 137 **Results**

138 From our observation in their wild habitat (the Mexican cave Pachón, Supplemental Movie 1),  
139 cavefish swam slower and remained near each other more frequently than the lab population. Because  
140 the cave environment has a limited diet compared to that of the surface, we predicted that cavefish  
141 experience frequent ketosis induced by fasting.

142 To avoid appetite-related behavior, we developed a ketogenic diet (KD) based on a human milk  
143 formula (KetoCal3:1® with Zeigler zebrafish standard irradiated diet at a 5:1 weight ratio [nutritionally  
144 complete, ketogenic medical food; Nutricia North America, Inc. Gaithersburg, MD, USA]; Table 1;  
145 Materials and Methods). To test whether our KD could induce a shift in the balance of ketone body and  
146 glucose levels, we measured blood ketone and glucose levels after chronic dietary treatment. Three-  
147 month-old fish (juvenile–young adult stage) were used in this study because many adult-type behaviors  
148 of cavefish emerge in this stage, including higher adherence to a vibration stimulus (vibration attraction  
149 behavior [VAB]) (Yoshizawa et al., 2010), less social affinity, and longer swimming distances compared  
150 to the findings in surface fish. After 5 weeks of KD feeding, both ketone and glucose concentrations  
151 were decreased compared to the findings in CD-fed fish (KetoCal3:1 and Zeigler zebrafish diet at a 1:5  
152 weight ratio; Table 1; Fig. 1A–C). For both diets, surface fish exhibited a significantly higher ketone  
153 body level than cavefish (Fig. 1B), whereas cavefish exhibited a higher glucose level than surface fish  
154 (Fig. 1C). The glucose ketone index ( $GKI = \frac{glucose (mM)}{ketone (mM)}$ ), a medical index proposed for brain cancer  
155 diagnosis (Meidenbauer et al., 2015), was lower in surface fish than in cavefish, and the value was  
156 reduced under KD feeding in both surface fish and cavefish compared to that in their CD-fed  
157 counterparts (Fig. 1D). This result indicated that KD feeding more strongly reduced glucose levels than  
158 ketone body levels, resulting in a lower GKI in KD-fed fish than in CD-fed fish (Fig. 1D) and  
159 suggesting that KD feeding could shift the metabolic state from glycolysis toward ketosis.

160

161 Table 1. Nutrient composition of each diet used in the study

| %                    | Zeigler zebrafish |               |            | Control diet<br>(CD)     | Ketogenic diet<br>(KD)   |
|----------------------|-------------------|---------------|------------|--------------------------|--------------------------|
|                      | Brine shrimp      | standard diet | KetoCal3:1 |                          |                          |
| Protein              | 58.4              | 54.0          | 15.3       | 47.6                     | 21.8                     |
| Lipid/fat            | 14.7              | 14.4          | 67.7       | 23.3                     | 58.8                     |
| Carbohydrate         | 5.2               | 11.6          | 7.2        | 10.9                     | 7.9                      |
| Ash                  | 7.2               | 15.5          | NA         | NA                       | NA                       |
| Calories<br>(kcal/g) | 5.9               | 3.9           | 7.0        | 4.4 (20% w/v<br>in agar) | 6.5 (20% w/v<br>in agar) |

162 (Paffenhöfer, 1967; Panda, 2016)

163

164 Regarding this dietary treatment, we first examined its ontogenic (developmental) effects on  
165 collective social-like behavior (Iwashita and Yoshizawa, 2021). Many adult behaviors emerge in the  
166 transition from juvenile to young adult (adolescent) in 3–4-month-old *A. mexicanus* fish, including  
167 foraging behavior, VAB (Yoshizawa, 2015; Yoshizawa et al., 2010), adult-type regulation of sleep  
168 (independent from catecholamine) (Duboué et al., 2012; Jaggard et al., 2020, 2017; Yoshizawa et al.,  
169 2015), and the collective behavior in young adults (under higher Reynold’s number; Iwashita and  
170 Yoshizawa, 2021). We therefore investigated the shift of collective behavior in 3–4-month-old fish using  
171 criteria based on the vicinity of two fish ( $\leq 5$  cm) and duration of nearby interactions ( $\geq 4$  s) during  
172 tracking in a four-fish group (Iwashita and Yoshizawa, 2021) (Fig. 2B). At 3 months old, (‘Pre-  
173 treatment’ in Fig. 2), surface fish exhibited social-like nearby interactions for  $17.0 \pm 4.4$  s (Fig. 2C) and  
174  $3.1 \pm 0.4$  bout number of nearby interactions (Fig. 2D) during the 5-min assay. Conversely, cavefish  
175 exhibited an approximately 50% shorter interaction duration ( $8.3 \pm 1.5$  s; Fig. 2C) and a smaller bout  
176 number of interactions ( $1.8 \pm 0.3$ ; Fig. 2D). To track the effect of the KD treatment, fish were fed the



177 KD for 5 weeks, followed by CD feeding during weeks 6–9 to assess the persistence of the effects of the  
178 KD (Fig. 2A, C, and D).

179 The nearby interactions of surface fish did not differ between CD and KD feeding (Fig. 2C and  
180 D). By contrast, the nearby interactions of cavefish were significantly decreased by CD feeding  
181 compared to the effects of KD feeding in weeks 4 and 5 (Fig. 2C and D), and interactions remained  
182 depressed through week 9 by CD feeding. This effect of the KD diet on nearby interactions did not  
183 persist. After KD deprivation and CD feeding, the nearby interactions of KD-fed cavefish were  
184 indistinguishable from those of CD-fed fish (6–9 weeks, Fig. 2C, and D), suggesting that KD has a  
185 promotive/supportive effect on collective behavior in genetically asocial cavefish.

186 To investigate in detail whether KD-promoted nearby interactions have social-like properties, we  
187 explored swimming speed, which is an indicator of the movement of fish in the vicinity of each other.  
188 Fish are more likely to have an opportunity to express affinity toward each other at a slower swimming  
189 speed (Iwashita and Yoshizawa, 2021). Indeed, surface fish moved slower during nearby interactions  
190 than during the non-nearby interaction period (Iwashita and Yoshizawa, 2021) (Fig. 3A). Consistently,  
191 KD-fed cavefish swam slower during the nearby interaction period than during the non-nearby  
192 interaction period ('5 weeks;' Fig. 3B). Overall swimming speed was also slower in the KD group than  
193 in the CD group ('5 weeks;' Fig. 3B). These findings indicated that KD-fed cavefish exhibited more  
194 social-like nearby interactions with a similar speed profile as surface fish. In surface fish, there was no  
195 major difference in swimming speed profiles between CD and KD feeding ('5 weeks;' Fig. 3A). To  
196 address whether the slower swimming speed was sufficient to increase nearby interactions, we tracked  
197 the total swimming distance within 5 min from pre-treatment to week 9 of feeding (Supplementary Fig.  
198 1). KD-fed cavefish exhibited a significantly shorter swimming distance (slower swimming speeds)  
199 from the first week of feeding (Supplementary Fig. 1), which was much earlier than when the higher  
200 level of nearby interactions emerged (weeks 4–5). This result suggests that although a slower swimming

201 speed is associated with nearby interactions (Fig. 3) and KD feeding reduced swimming speeds in  
202 cavefish, a slower speed itself is not sufficient to induce nearby interactions.

203 Repetitive turning is frequently observed in an antagonistic relationship with nearby interactions  
204 in cavefish (Iwashita and Yoshizawa, 2021). That is, individuals with few nearby interactions frequently  
205 exhibit a high level of turning bias or ‘repetitive turning.’ Accordingly, CD-fed cavefish with few nearby  
206 interactions (4–5 weeks) exhibited significantly higher turning bias than KD-fed cavefish (Fig. 4A, B).  
207 KD-fed cavefish displayed a comparable level of balanced turning as surface fish (close to a score of ‘1’  
208 in Fig. 4B). In summary, these results suggest that KD feeding could reduce repetitive turning while  
209 maintaining longer nearby interactions.

210 Tracking behavioral changes each week (Fig. 2) may result in confounding factors such as fish  
211 remembering the recording environment. To clarify whether our results captured the genuine effects of  
212 KD feeding, we repeated 4–5-week dietary treatment in a new set of fish (Supplementary Fig. 2).  
213 Similarly, surface fish did not exhibit a detectable change in the duration and number of nearby  
214 interactions between CD and KD feeding (Supplementary Fig. 2A, B). By contrast, CD-fed cavefish  
215 displayed fewer nearby interactions, whereas the level of nearby interactions was retained in KD-fed  
216 cavefish, resulting in a higher level of nearby interactions in KD-fed cavefish (Supplementary Fig. 2A,  
217 B). In this repeated experiment, the results for swimming distance and repetitive turning were also  
218 similar to those in the previous experiment; specifically, CD-fed cavefish swam longer distances than  
219 KD-fed cavefish (Supplementary Fig. 2C), whereas surface fish did not exhibit a detectable shift in  
220 swimming distance between the CD and KD groups. Additionally, CD-fed cavefish displayed a high  
221 level of turning bias, whereas KD-fed cavefish exhibited balanced turning (Supplementary Fig. 2D).

222  
223 We then explored other changes induced by KD feeding, including changes in sleep, 24-h  
224 swimming distance, and adherence to a vibrating stimulus, which are distinct between surface fish and  
225 cavefish. Cavefish largely exhibit reduced sleep duration and swim almost all day, perhaps to find

226 nutrients in the food-sparse environment (Duboué et al., 2012, 2011; Jaggard et al., 2017; Yoshizawa et  
227 al., 2015). After 5 weeks of dietary treatment on the 3 – 4 months old fish, both surface fish and cavefish  
228 exhibited a shorter sleep duration than observed before treatment regardless of the diet (Fig. 5A,  
229 particularly at night), suggesting growth between 3 – 4 and 4 – 5 months old exerted a negative effect on  
230 the sleep duration. However, there was no detectable difference between CD and KD feeding.

231         Animals' sleep is usually fragmented, involving repeated sleep/awake cycles during the night  
232 (diurnal animals) or day (nocturnal animals) (Campbell and Tobler, 1984). Then, the structure and  
233 regulation of sleep are typically analyzed according to the number of events (bout). Our detailed sleep  
234 analysis illustrated that KD-fed cavefish displayed fewer sleep bouts during the night than CD-fed  
235 cavefish (Fig. 5B). However, the number of sleep bouts did not differ between CD and KD feeding (5  
236 weeks; Supplementary Fig. 3). Overall, the sleep phenotype was not dramatically changed by KD  
237 feeding, and cavefish exhibited a shortened sleep duration.

238         The sleep duration is negatively correlated with the 24-h swimming distance (Yoshizawa et al.,  
239 2015). Cavefish displayed overall higher activities, which was consistent with previous findings  
240 (Duboué et al., 2011; Yoshizawa et al., 2015) and consistent with the findings of longer swimming  
241 distance in the nearby interaction assay (Fig. 5C). CD-fed cavefish swam longer distances than KD-fed  
242 cavefish. Surface fish, in contrast, did not exhibit a detectable difference in swimming distance between  
243 KD and CD feeding. Overall, the KD treatment induced little changes in sleep behaviors in both surface  
244 and cavefish.

245         In general, the KD is assumed to induce ketosis without increasing appetite. We then checked the  
246 shift of foraging behavior under KD feeding. Cavefish evolutionarily exhibit increased foraging  
247 behavior, termed VAB, in which fish adhere to a particular vibration stimulus (35–40 Hz) in the dark  
248 (Yoshizawa et al., 2010). VAB is advantageous for prey capture in the dark. Cavefish and surface fish  
249 did not exhibit a detectable difference in VAB between CD and KD feeding, whereas VAB was  
250 significantly increased during 1 month of growth (pre-treatment vs. 5 weeks; Supplementary Fig. 4A).

251 The swimming distance in 3-min VAB assays was decreased in KD-fed cavefish, consistent with the  
252 nearby interaction and sleep studies (5 weeks; Supplementary Fig. 4B). In summary, the VAB analysis  
253 indicated that KD feeding did not increase a foraging behavior.

254 Although the KD diet induced significant changes in some behavioral outputs, it suppressed  
255 growth during treatment. The average weights of KD-fed surface fish and cavefish were 55.5 % and  
256 69.9 % of those in their CD-fed counterparts, respectively (5 weeks; Fig. 6B). The standard length of  
257 KD-fed surface fish was also significantly reduced (5 weeks; Fig. 6A).

258

259 Are these behavioral and growth changes induced by ketosis? The KD contains high amounts of  
260 fat and other ingredients. This question motivated us to test the molecular basis of the effects of the KD  
261 by adding major ketosis metabolites to the standard diet.

262 In humans, the KD induces ketosis, in which the liver releases the major ketone body, beta-  
263 hydroxybutyrate (BHB), via beta-oxidation of fat (Evans et al., 2017). Instead of supplying a massive  
264 amount of fat using the KD, BHB (sodium salt form of racemic BHB: 50% L-form and 50% D-form;  
265 only the D-form is considered to be biologically active) might be responsible for the majority of effects  
266 observed after KD feeding. With this idea, sodium salt BHB was provided to both surface fish and  
267 cavefish for 4 weeks. The result indicated that the BHB supplemental diet promoted nearby interactions  
268 in cavefish (Fig. 7A and B) and reduced the duration of nearby interactions in surface fish (Fig. 7A).  
269 Turning bias tended to be reduced by BHB supplementation in cavefish, although significance was not  
270 achieved (Fig. 7C). Swimming distance was not reduced in surface fish or cavefish (Fig. 7D). The body  
271 growth of BHB-treated surface fish and cavefish was comparable to that in control fish (standard length  
272 and weight; Supplementary Fig 5A and B, respectively). The night-time sleep and VAB did not exhibit  
273 detectable differences between control and BHB treatment (Supplementary Fig. 6A and B, respectively)

274            In summary, BHB treatment covered many effects of KD treatment did, including changes in  
275 social interactions and repetitive turning. BHB had fewer negative effects on growth and swimming  
276 activities, suggesting that ketone bodies are responsible for the ‘positive’ effects of KD feeding.

277

278

## 279 **Discussion**

280 In this study, we examined the behavioral shifts induced by KD feeding and BHB  
281 supplementation. Ketosis is expected to occur frequently in wild animals because of a failure to find  
282 food (fasting) or an absence of carbohydrate inputs/synthesis (available nutrients). Certain levels of  
283 socialness can be beneficial to animal species for mating and finding food. Under KD feeding, cavefish  
284 maintained their juvenile level of nearby interactions until the treatment ended (5 weeks). Nearby  
285 interactions were then reduced to an indistinguishable level from the control levels within 1 month after  
286 stopping KD feeding. Surface fish exhibited a higher number of nearby interactions than cavefish, and  
287 no detectable difference was observed in nearby interaction levels between CD- and KD-fed surface  
288 fish. KD feeding also effectively reduced repetitive turning in cavefish, whereas CD-fed treated cavefish  
289 exhibited a high level of repetitive turning. Under KD feeding, both surface fish and cavefish  
290 significantly reduced swimming distances during development, during which the swimming distance  
291 typically becomes longer. There were no detectable changes in sleep and foraging behavior (VAB)  
292 under 1 month of KD feeding. These patterns in behaviors and growth were not changed in two  
293 replicated experiments (social affinity and repetitive turning), supporting the consistency of the observed  
294 effects under KD feeding. Finally, the major KD metabolite, BHB, could cover the KD effect, indicating  
295 the ketone body has the pivotal role on this treatment.

296

### 297 *Effects of the KD on blood ketone levels and body growth*

298 Under 4–5 weeks of KD feeding, blood ketone and glucose levels were reduced compared to the  
299 effects of the CD in both surface fish and cavefish, contradicting our expectation that ketone levels  
300 would be higher in the KD group. However, GKI (Meidenbauer et al., 2015) was significantly lower  
301 under KD feeding than under CD feeding. These significant changes in GKI in both surface fish and  
302 cavefish suggest that the metabolic condition was shifted toward ketosis by KD feeding. In general,  
303 cavefish had a higher GDI than surface fish under both diets, suggesting that the cavefish physiology

304 was constitutively biased toward glycolysis. For example, blood glucose levels in cavefish under KD  
305 feeding were similar to those in surface fish under CD feeding, whereas cavefish had 3-fold lower  
306 ketone levels than surface fish under CD feeding, resulting in a higher GKI even under KD feeding.

307 KD feeding for 4–5 weeks also resulted in slowed body growth. This growth retardation has been  
308 observed in patients with epilepsy chronically fed a KD (Coppola et al., 2010; Napoli et al., 2014), and  
309 these results were consistent with our observations in KD-fed fish. The detailed molecular/physiological  
310 mechanisms are largely unknown, but this study identified BHB as a potential candidate mediating KD-  
311 associated phenotypes (see below).

312

### 313 *Effects of ketones in the TCA cycle and epigenetics in the brain*

314 In mammals, KD feeding causes a ‘starvation’-like state, causing the liver to release ketone  
315 bodies into the bloodstream. BHB is the major ketone body produced by the liver through beta-  
316 oxidation. The gut epithelia also absorb and circulate ketone bodies from the diet and/or gut microbiota.  
317 Both liver- and gut-derived ketone bodies can cross the blood–brain barrier and exert two functions: (i)  
318 inhibit histone deacetylase, which influences epigenetic regulation and induces gene expression in  
319 neurons; and (ii) act as a general energy source that is converted into acetyl-CoA to fuel the aerobic  
320 TCA cycle in neurons. Both pathways have the potential to alter brain function. The facts that cavefish  
321 easily tolerate high blood glucose levels, at which surface fish was paralyzed (Riddle et al., 2018), and  
322 Wnt signaling is upregulated in cavefish, potentially resulting in high glycolytic activity as humans do  
323 (Vallée and Vallée, 2018; Yoshizawa et al., 2018), support the aforementioned hypothesis that cavefish  
324 exhibit high blood glucose levels and generate energy via glycolysis. Also, ketone bodies can also  
325 promote behavioral shifts by changing the epigenetic state by inhibiting histone deacetylase  
326 (Krautkramer et al., 2017; Szyf, 2015). Histone deacetylase inhibition increases gene expression in  
327 general. This possibility is supported by the fact that cavefish have more downregulated genes (2913  
328 genes,  $\log_2 < -1.0$ ) than upregulated genes (1643 genes,  $\log_2 > 1.0$ ) in the transcriptome at 72 h post-

329 fertilization (Gross et al., 2013; Yoshizawa et al., 2018). In addition, more methylated loci are found in  
330 the eye genes of cavefish than in surface fish, which could also be true for other tissues (Gore et al.,  
331 2018), and most of these methylated gene loci were downregulated. The brains of patients with autism  
332 are also expected to be hypermethylated, resulting in a transcription-less condition (Zhu et al., 2014).  
333 Therefore, these two pathways, namely metabolism and epigenetics, were highlighted as possible targets  
334 of ketone bodies during behavioral shifts under ketosis. Future research should address these  
335 possibilities to clarify the metabolism-based evolution of behavior (*cf.* (Qin et al., 2021)

336

### 337 *Ontogeny of nearby interactions and the KD*

338 In this study, 3-4 months-old cavefish exhibited a weak but detectable level of nearby  
339 interactions (social affinity), and this social affinity decayed under CD feeding. Interestingly, KD-fed  
340 cavefish and surface fish fed either diet maintained a similar level of nearby interactions during 5 weeks  
341 of dietary feeding. The reduction of nearby interactions in CD-treated cavefish can be explained by (1)  
342 quicker exhaustion under CD feeding (aerobic ketosis produces more adenosine triphosphate than  
343 anaerobic glycolysis), (2) greater anxiety in the recording environment (Iwashita and Yoshizawa, 2021),  
344 and (3) less social motivation. The first explanation is unlikely because CD-fed cavefish swam longer  
345 distances than KD-fed cavefish. The higher level of anxiety could explain the findings because cavefish  
346 exhibited increased repetitive turning, which is related to higher anxiety in mammals (Langen et al.,  
347 2011). In addition, cavefish displayed fewer nearby interactions in an anxiety-associated unfamiliar  
348 environment in prior research (Iwashita and Yoshizawa, 2021). In the future, the anxiety level should be  
349 monitored using plasma cortisol levels in the future (Gallo and Jeffery, 2012). Less motivation regarding  
350 social affinity is also a possible cause, and this variable can be monitored by assessing activities in social  
351 decision-making networks including the preoptic area, nucleus accumbens, and striatum (O'Connell and  
352 Hofmann, 2012, 2011). Explanations (2) and (3) are not mutually exclusive, and co-occurrence is  
353 possible. These possibilities will be assessed in our future study.



354

355 *Possible target system for ketosis*

356 Under KD feeding and BHB treatment, we observed increased social affinity and reduced  
357 repetitive turning and swimming distances. However, we detected no changes in sleep and VAB. From  
358 the knowledge of neurotransmitters and their associated behaviors, these behavioral phenotypes  
359 indicated the possible involvement of the dopaminergic and serotonergic systems but less involvement  
360 of the cholinergic, orexin/hypocretinergic, histaminergic, or adrenergic system. The mechanism by  
361 which ketosis or ketone bodies more strongly affect the dopaminergic and serotonergic systems than the  
362 other systems is unclear. However, the findings that the dopaminergic and serotonergic systems are  
363 sensitive to ketosis in terms of evolution are extremely interesting in its mechanism and for future  
364 therapy applications.

365

366 *Ketosis in the cave environment*

367 Cave-dwelling animals usually experience less temperature fluctuation and fewer dietary inputs  
368 (Culver and Pipan, 2009), but these features can vary. The diets of cave-dwelling animals in the dry  
369 season (approximately 6 months/year) could be organic matter in the pool bottoms, bat guano (larger  
370 adults), or small crustaceans (smaller fish), whereas food is sparse in the rainy season (approximately 6  
371 months/year) (Espinasa et al., 2021, 2017). These available diets contain extremely low amounts of  
372 carbohydrates, and they can be high in protein and fat (e.g., crustaceans). Although some amino acids,  
373 lactate, and glycerol can be used for glucose synthesis in fish (Polakof et al., 2012), cavefish are  
374 expected to be exposed to carbohydrate-deprived diets or frequent fasting and therefore frequent ketosis.  
375 In prior research, wild cavefish swam slower and exhibited similar social affinity as observed in KD-fed  
376 cavefish in this study (Movie 1). Although these observations and dietary inputs suggested that wild  
377 cavefish may be under frequent ketosis, recent multiple reports indicated that cavefish may be under  
378 anaerobic glycolysis to adapt to anaerobic cave water conditions because of the approximately 20%

379 lower oxygen level in cave pools (Boggs et al., 2022; van der Weele and Jeffery, 2022). In addition,  
380 cavefish tend to store lipids instead of using them through the enhanced PPAR $\gamma$  pathway (Xiong et al.,  
381 2022). These expectations of low ketosis appear to contradict expectations in the wild—starved ketosis  
382 conditions. However, it appears to fit well with the findings in cavefish, namely high blood glucose and  
383 low ketone levels even under KD feeding in this study, as well as higher GKI in cavefish than in surface  
384 fish in both the CD and KD groups (Fig. 1D). Cavefish appear to have evolved to maintain a high GKI  
385 (high blood glucose and low ketone levels); therefore, the physiology of cavefish may allow them to  
386 survive in the low-oxygen condition by using anaerobic glycolysis. KD-fed cavefish behave similarly as  
387 wild cavefish because the balance between ketosis and glycolysis could reach a similar level as that in  
388 the wild after KD feeding. By contrast, if cavefish are fed a typical carbohydrate-rich lab fish diet, it  
389 may overactivate glycolysis and result in a higher GKI, which may lead to reduced social affinity and  
390 increased repetitive circling and swimming distance. The future use of a pharmacological glycolysis  
391 inhibitor (e.g., 2-deoxy-D-glucose; Yao et al., 2011) can reveal the relationship between GKI and  
392 cavefish behaviors.

393

#### 394 *Summary statement*

395 Solitary animals surprisingly share a set of dysregulated genes and behavioral outputs. In this  
396 study, we demonstrated that a diet that induces ketosis shifts these behaviors toward the surface fish  
397 phenotype regardless of the presence of many dysregulated genes. In addition to the gene therapy  
398 approach, ketone body-based treatment may open a path for sustainable and less toxic therapy for  
399 multigenic psychiatric disorders, including autism, although the target pathways remain unclear.  
400 Concerning the genetics of behavior, differentially expressed metabolic genes have been largely  
401 overlooked because it was difficult to interpret. Because mitochondria-based disorders are highlighted in  
402 neuroscience (Chauhan et al., 2012; Rajasekaran et al., 2015), the balance between glycolysis and  
403 ketosis could be the starting point for identifying a therapeutic target. The known evolved behaviors

404 should be also revisited by investigating whether the metabolic shift promotes the variations of  
405 behaviors.  
406

## 407 **Materials and Methods**

### 408 Fish maintenance and rearing in the lab

409 *A. mexicanus* surface fish used in this study were the laboratory-raised descendants of original  
410 collections created in Balmorhea Springs State Park in Texas in 1999 by Dr. William R. Jeffery.  
411 Cavefish were laboratory-raised descendants originally collected from Cueva de El Pachón (Pachón  
412 cavefish) in Tamaulipas, Mexico in 2013 by Dr. Richard Borowsky.

413 Fish (surface fish and Pachón cave populations) were housed in the University of Hawai'i at  
414 Mānoa *Astyanax* facility with temperatures set at  $21 \pm 0.5^\circ\text{C}$  for rearing,  $24 \pm 0.5^\circ\text{C}$  for behavior  
415 experiments, and  $25 \pm 0.5^\circ\text{C}$  for breeding (Elipot et al., 2014; Yoshizawa et al., 2015). Lights were  
416 maintained on a 12-h:12-h light:dark cycle (Elipot et al., 2014; Yoshizawa et al., 2015). For rearing and  
417 behavior experiments, the light intensity was maintained at 30–100 Lux. Fish husbandry was performed  
418 as previously described (Elipot et al., 2014; Keene et al., 2016; Yoshizawa et al., 2015). Fish were raised  
419 to adulthood and maintained in standard 42-L tanks in a custom-made water-flow tank system. Adult  
420 fish were fed a mixed diet to satiation twice daily starting 3 h after the lights were turned on (Zeitgeber  
421 time 3 [ZT3] and ZT9; Zeigler Adult zebrafish irradiated diet, Zeigler Bros, Inc, Gardners, PA;  
422 TetraColor Tropical Fish Food Granules, Tetra, Blacksburg, VA, USA; Jumbo Mysis Shrimp, Hikari  
423 Sales USA, Inc., Hayward, CA, USA). All fish in the behavioral experiments were between 2.5 and 5  
424 cm in standard length and between 3 and 12 months old. Fish ages were stated in each experiment. All  
425 fish care and experimental protocols were approved under IACUC (17-2560) at the University of  
426 Hawai'i at Mānoa.

427

### 428 Ketogenic diet

429 To prepare the KD, we used a mixture of a human KD (KetoCal3:1) and zebrafish standard diet  
430 (adult zebrafish irradiated diet) in a 5:1 ratio. The gross caloric amounts were 6.99 kcal/g for KetoCal3:1  
431 and 3.89 kcal/g for the zebrafish diet. Regarding the CD, we used the same KetoCal3:1 and zebrafish

432 irradiated diet but mixed at a 1:5 ratio. The KetoCal3:1 powder and ground zebrafish irradiated diet were  
433 mixed in the aforementioned ratios and solidified with 1% agar at a final concentration of 20% w/v (2 g  
434 of mixture in 10 mL of 1% agar). After solidification, both KD and CD agar was cut into 3-mm<sup>3</sup> cubes,  
435 and each four-fish group was given 1–2 pieces every morning (ZT 0:00–3:30) and afternoon (ZT 8:00–  
436 12:00). The fish were fed ad libitum in each feeding and the remaining amount was removed 1 h after  
437 feeding using a pipette.

438

#### 439 Behavior assays

440 The protocol for social-like nearby interactions was described previously (Iwashita and  
441 Yoshizawa, 2021). Briefly, four fish raised in a home tray (15.6 × 15.6 × 5.7 cm<sup>3</sup> Ziploc containers, S.  
442 C. Johnson & Sons, Inc, Racine, WI, USA) were released in a recording arena (49.5 × 24.2 × 6.5 cm<sup>3</sup>)  
443 with a water depth of 3 cm on the stage of a custom-made infrared (IR) back-light system within a  
444 custom-built black box (75 × 50 × 155 cm, assembled with polyvinyl chloride pipe frame and covered  
445 by shading film). The IR back-light system was composed of bounce lighting of IR LED strips  
446 (SMD3528 850 nm strip: LightingWill, Guang Dong, China). The video was recorded at 20 frame/s  
447 using VirtualDub2 software (build 44282; <http://virtualdub2.com/>) with the x264vfw codec for 6 min,  
448 and the last 5 min were used for the analysis. After the recording, the fish were returned to the home  
449 tray. The X-Y coordinates of each fish were calculated using idTracker software (Pérez-Escudero et al.,  
450 2014) after the video image was processed for background subtraction using ImageJ (Iwashita and  
451 Yoshizawa, 2021). This X-Y coordinate was also used for the turning bias analysis. The duration and  
452 number of nearby interactions and swimming speed during and after nearby interaction events were  
453 calculated using custom-made MATLAB script (MathWorks Inc., Natick, MA, USA) (Iwashita and  
454 Yoshizawa, 2021).

455 The turning bias rate was calculated as  $\frac{NI}{Ns}$ , where Ns and NI represent a smaller (Ns) or larger  
456 (NI) number of left or right turns. This turning bias rate indicates the extent to which fish turning is

457 biased to the left or right, and ranging from ‘1’ (L-R balanced) to exponential (L or R biased). The  
458 numbers of left or right turns were calculated as changes in the angles of swimming directions in every  
459 five frame window (0.25 s) as described previously (Iwashita and Yoshizawa, 2021). An automatic  
460 calculation of the total number of the left or right turns is implemented in the aforementioned homemade  
461 MATLAB script.

462         Analyses of sleep and swimming distance were described previously (Yoshizawa et al., 2018,  
463 2015). Briefly, fish were recorded in a custom-designed 10.0-L acrylic recording chamber ( $457.2 \times$   
464  $177.8 \times 177.8 \text{ mm}^3$  and 6.4 mm thick) with opaque partitions that permit five individually housed fish  
465 per tank (each individual chamber was  $88.9 \times 177.8 \times 177.8 \text{ mm}^3$ ). The recording chamber was  
466 illuminated with a custom-designed IR LED source the light-controlled room on a 12-h:12-h cycle. The  
467 room light was turned on at 7:00 am and turned off at 7:00 pm each day. Behavior was recorded for 24 h  
468 after overnight (18–20 h) acclimation beginning 1–2 h after turning the light on (ZT1–2). Videos were  
469 recorded at 15 frames/s using a USB webcam with an IR high-pass filter. Videos were captured by  
470 VirtualDub2 software with the x264vfw codec and subsequently processed using Ethovision XT  
471 (Version 16, Noldus Information Technology, Wageningen, Netherlands). Water temperature was  
472 monitored throughout the recordings, and no detectable differences were observed during the light and  
473 dark periods ( $24.0 \pm 0.5^\circ\text{C}$ ). The visible light during behavior recordings was approximately 30–100  
474 Lux.

475         The tracking parameters for detection were as follows: the detection was set to ‘subject brighter  
476 than background’ and brightness contrast was set from 20 to 255; the current frame weight was set to 15;  
477 the video sample rate was set to 15 frames/s; and pixel smoothing was turned off. We monitored sleep,  
478 activity, and arousal thresholds via protocols previously established for *A. mexicanus* (Yoshizawa et al.,  
479 2015). The X-Y coordinates of each fish were subsequently processed using custom-written Perl  
480 (v5.23.0, [www.perl.org](http://www.perl.org)) and Python scripts (3.8).

481 We assayed VAB as described previously (Yoshizawa et al., 2015, 2012, 2010). Briefly, fish  
482 were permitted to acclimate for 4–5 days prior to the assay in a cylindrical assay chamber (325-mL glass  
483 dish, 10 cm in diameter and 5 cm in height, VWR, Radnor, PA, USA) filled with conditioned water (pH  
484 6.8–7.0; conductivity 600–800  $\mu$ S). During the assays, vibration stimuli were created using a glass rod  
485 that vibrated at 40 Hz. The number of approaches to the vibrating rod was video recorded during a 3-min  
486 period under infrared illumination. The number of fish approaches in a 1.3-mm radius from the vibrating  
487 glass rod were analyzed using the X-Y coordinate of each fish head detected by the trained DeepLabCut  
488 model (Mathis et al., 2018; Fernandez et al., *submitted*)

489

#### 490 Blood ketone and glucose measurements

491 The fish used to measure ketone and glucose levels were the siblings of the fish used for the  
492 behavioral assay. Eight fish were used for each treatment group (CD vs. KD, surface fish vs. cavefish;  
493 four groups in total). All blood samples were collected 2 h after feeding. Fish were then deeply  
494 anesthetized in ice-cold water, and blood was collected from the tail artery. Blood ketone and glucose  
495 levels were measured using an Abbott Precision Xtra blood glucose & ketone monitoring system  
496 (Abbott Laboratories, Abbott Park, IL, USA)

497

#### 498 Measurement of tissue structure

499 Fish were anesthetized with 0.2 mg/mL ethyl 3-aminobenzoate methanesulfonate (MS-222:  
500 MilliporeSigma, Burlington, MA, USA) in ice-cold conditioned water (pH: 7.0; conductivity: 700  $\mu$ S),  
501 and weight was measured after taking pictures with a standard camera (Pentax K-1 DSLR with 35-70  
502 mm zoom lens, Ricoh, Tokyo, Japan). The standard body length and body depth were measured using  
503 ImageJ.

504

#### 505 Statistical analysis

506           Regarding the power analysis, we designed our experiments based on three-way repeated-  
507 measures ANOVA with a moderate effect size ( $f = 0.25$ ), alpha-error probability of 0.05, and power of  
508 0.80, and the number of groups was eight (surface fish vs. cavefish  $\times$  non-treated vs. treated  $\times$  pre-  
509 treatment vs. post-treatment). G\*Power software (Erdfelder et al., 2009; Faul et al., 2007) estimated that  
510 the sample size needed for this experiment was nine per group. We thus aimed to use at least 12 fish in  
511 each group for all experiments in this study.

512           For statistical comparisons of our data, we performed tests including Student's *t*-test and two- or  
513 three-way generalized linear model analyses to compare surface and cavefish, treatment and non-  
514 treatment, and pre-treatment and post-treatment. We calculated Akaike's information criterion (AIC) for  
515 each linear and generalized linear model and chose the model with the lowest AIC. Holm's post hoc  
516 correction was used to understand which contrasts were significant (Holm, 1979).

517           Regarding replicates of experiments, we used different individuals for the replicates, namely two  
518 biological replicates, using different individuals in each trial (*e.g.*, Fig. 2 and Supplementary Fig. 2).  
519 There was no repeated usage of individual fish excluding the time-course experiment (Fig. 2). For the  
520 experiments measuring sleep and VAB in addition to nearby interactions and turning bias (Figs. 5–6,  
521 Supplementary Figs. 2–4), we used two biological replicates and confirmed that the averages of  
522 experimental data did not largely differ from each other. We then merged the data acquired in two  
523 biological replicates and presented the data as a single set of results.

524           The aforementioned calculations were performed using R version 4.0.4 software (packages of  
525 *car*, *lme4*, and *lmerTest*) (Bates et al., 2015; Fox and Weisberg, 2019; Kuznetsova et al., 2017), and all  
526 statistical scores are available in Supplementary Table 1, the figure legends, or the text.

527  
528  
529



## 530 **References**

- 531 Aspiras AC, Rohner N, Martineau B, Borowsky RL, Tabin CJ. 2015. Melanocortin 4 receptor mutations  
532 contribute to the adaptation of cavefish to nutrient-poor conditions. *Proc Natl Acad Sci U S A*  
533 **112**:9668–9673. doi:10.1073/pnas.1510802112
- 534 Bellisari A. 2008. Evolutionary origins of obesity. *Obes Rev*. doi:10.1111/j.1467-789X.2007.00392.x
- 535 Bilandžija H, Abraham L, Ma L, Renner KJ, Jeffery WR. 2018. Behavioural changes controlled by  
536 catecholaminergic systems explain recurrent loss of pigmentation in cavefish. *Proc R Soc B Biol*  
537 *Sci* **285**:20180243. doi:10.1098/rspb.2018.0243
- 538 Bilandžija H, Ma L, Parkhurst A, Jeffery WR. 2013. A potential benefit of albinism in *Astyanax*  
539 cavefish: Downregulation of the *oca2* gene increases tyrosine and catecholamine levels as an  
540 alternative to melanin synthesis. *PLoS One* **8**:e80823. doi:10.1371/journal.pone.0080823
- 541 Boggs TE, Friedman JS, Gross JB. 2022. Alterations to cavefish red blood cells provide evidence of  
542 adaptation to reduced subterranean oxygen. *Sci Rep* **12**:1–10. doi:10.1038/s41598-022-07619-0
- 543 Campbell SS, Tobler I. 1984. Animal sleep: A review of sleep duration across phylogeny. *Neurosci*  
544 *Biobehav Rev* **8**:269–300. doi:10.1016/0149-7634(84)90054-X
- 545 Chauhan A, Gu F, Chauhan V. 2012. Mitochondrial respiratory chain defects in autism and other  
546 neurodevelopmental disorders. *J Pediatr Biochem* **2**:213–223. doi:10.3233/JPB-120063
- 547 Coppola G, Verrotti A, Ammendola E, Operto FF, Corte R della, Signoriello G, Pascotto A. 2010.  
548 Ketogenic diet for the treatment of catastrophic epileptic encephalopathies in childhood. *Eur J*  
549 *Paediatr Neurol* **14**:229–234. doi:10.1016/j.ejpn.2009.06.006
- 550 Culver DC, Pipan T. 2009. The biology of caves and other subterranean habitats, The biology of habitats  
551 series. Oxford: Oxford University Press.
- 552 Deemer SE, Plaisance EP, Martins C. 2020. Impact of ketosis on appetite regulation—a review. *Nutr*  
553 *Res* **77**:1–11. doi:10.1016/j.nutres.2020.02.010
- 554 Duboué ER, Borowsky RL, Keene AC. 2012.  $\beta$ -adrenergic signaling regulates evolutionarily derived  
555 sleep loss in the Mexican cavefish. *Brain Behav Evol* **80**:233–43. doi:10.1159/000341403
- 556 Duboué ER, Keene AC, Borowsky RL. 2011. Evolutionary convergence on sleep loss in cavefish  
557 populations. *Curr Biol* **21**:671–676. doi:10.1016/j.cub.2011.03.020
- 558 Elipot Y, Hinaux H, Callebert J, Rétaux S. 2013. Evolutionary shift from fighting to foraging in blind  
559 cavefish through changes in the serotonin network. *Curr Biol* **23**:1–10.
- 560 Elipot Y, Legendre L, Père S, Sohm F, Rétaux S. 2014. *Astyanax* transgenesis and husbandry: how  
561 cavefish enters the laboratory. *Zebrafish* **11**:291–9. doi:10.1089/zeb.2014.1005
- 562 Erdfelder E, Faul F, Buchner A, Lang AG. 2009. Statistical power analyses using G\*Power 3.1: Tests  
563 for correlation and regression analyses. *Behav Res Methods* **41**:1149–1160.  
564 doi:10.3758/BRM.41.4.1149
- 565 Espinasa L, Bonaroti N, Wong J, Pottin K, Queinnec E, Rétaux S. 2017. Contrasting feeding habits of  
566 post-larval and adult *Astyanax* cavefish. *Subterr Biol* **21**:1–17. doi:10.3897/subtbiol.21.11046
- 567 Espinasa L, Heintz C, Rétaux S, Yoshisawa M, Agnès F, Ornelas-Garcia P, Balogh-Robinson R. 2021.  
568 Vibration attraction response is a plastic trait in blind Mexican tetra (*Astyanax mexicanus*), variable  
569 within subpopulations inhabiting the same cave. *J Fish Biol* **98**:304–316. doi:10.1111/jfb.14586
- 570 Evangelidou A, Vlachonikolis I, Mihailidou H, Vlachonikolis I, Mihailidou H, Spilioti M, Skarpalezou  
571 A, Makaronas N, Prokopiou A, Christodoulou P, Liapi-Adamidou G, Helidonis E, Sbyrakis S,  
572 Smeitink J. 2003. Application of a Ketogenic Diet in Children With Autistic Behavior: Pilot Study.  
573 *J Child Neurol* **18**:113–118. doi:10.1177/08830738030180020501
- 574 Evans M, Cogan KE, Egan B. 2017. Metabolism of ketone bodies during exercise and training:  
575 physiological basis for exogenous supplementation. *J Physiol* **595**:2857–2871.  
576 doi:10.1113/JP273185
- 577 Faul F, Erdfelder E, Lang AG, Buchner A. 2007. G\*Power 3: A flexible statistical power analysis  
578 program for the social, behavioral, and biomedical sciences *Behavior Research Methods*. Springer.

- 579 pp. 175–191. doi:10.3758/BF03193146
- 580 Filosa A, Barker AJ, Dal Maschio M, Baier H. 2016. Feeding State Modulates Behavioral Choice and  
581 Processing of Prey Stimuli in the Zebrafish Tectum. *Neuron* **90**:596–608.  
582 doi:10.1016/j.neuron.2016.03.014
- 583 Fokidis HB, Prior NH, Soma KK. 2013. Fasting increases aggression and differentially modulates local  
584 and systemic steroid levels in male zebra finches. *Endocrinology* **154**:4328–4339.  
585 doi:10.1210/en.2013-1171
- 586 Fumey J, Hinaux H, Noirot C, Thermes C, Rétaux S, Casane D. 2018. Evidence for late Pleistocene  
587 origin of *Astyanax mexicanus* cavefish. *BMC Evol Biol* **18**:43. doi:10.1186/s12862-018-1156-7
- 588 Gallo ND, Jeffery WR. 2012. Evolution of space dependent growth in the teleost *Astyanax mexicanus*.  
589 *PLoS One* **7**:e41443. doi:10.1371/journal.pone.0041443
- 590 Gore A V., Tomins KA, Iben J, Ma L, Castranova D, Davis AE, Parkhurst A, Jeffery WR, Weinstein  
591 BM. 2018. An epigenetic mechanism for cavefish eye degeneration. *Nat Ecol Evol* **2**:1155–1160.  
592 doi:10.1038/s41559-018-0569-4
- 593 Gross JB, Furterer A, Carlson BM, Stahl BA. 2013. An integrated transcriptome-wide analysis of cave  
594 and surface dwelling *Astyanax mexicanus*. *PLoS One* **8**:e55659. doi:10.1371/journal.pone.0055659
- 595 Helt MS, Fein DA, Vargas JE. 2020. Emotional contagion in children with autism spectrum disorder  
596 varies with stimulus familiarity and task instructions. *Dev Psychopathol* **32**:383–393.  
597 doi:10.1017/S0954579419000154
- 598 Herman A, Brandvain Y, Weagley J, Jeffery WR, Keene AC, Kono TJY, Bilandžija H, Borowsky R,  
599 Espinasa L, O’Quin K, Ornelas-García CP, Yoshizawa M, Carlson B, Maldonado E, Gross JB,  
600 Cartwright RA, Rohner N, Warren WC, McGaugh SE. 2018. The role of gene flow in rapid and  
601 repeated evolution of cave-related traits in Mexican tetra, *Astyanax mexicanus*. *Mol Ecol* **27**:4397–  
602 4416. doi:10.1111/mec.14877
- 603 Holm S. 1979. A simple sequentially rejective multiple test procedure. *Scand J Stat.*
- 604 Huppok K. 1986. Oxygen-Consumption of *Astyanax-Fasciatus* (Characidae, Pisces) - a Comparison of  
605 Epigeal and Hypogeal Populations. *Environ Biol Fishes* **17**:299–308.
- 606 Iwashita M, Yoshizawa M. 2021. Social-like responses are inducible in asocial Mexican cavefish despite  
607 the exhibition of strong repetitive behavior. *Elife* **10**:e72463. doi:10.7554/eLife.72463
- 608 Jaggard JB, Lloyd E, Yuiska A, Patch A, Fily Y, Kowalko JE, Appelbaum L, Duboue ER, Keene AC.  
609 2020. Cavefish brain atlases reveal functional and anatomical convergence across independently  
610 evolved populations. *Sci Adv* **6**:3126–3142. doi:10.1126/sciadv.aba3126
- 611 Jaggard JB, Stahl BA, Lloyd E, Duboue ER, Keene AC, Prober DA, Duboue ER, Keene AC. 2017.  
612 Hypocretin underlies the evolution of sleep loss in the Mexican cavefish. *Elife* **7**.  
613 doi:10.7554/eLife.32637
- 614 Keene AC, Yoshizawa M, McGaugh SE. 2016. Biology and Evolution of the Mexican Cavefish,  
615 Biology and Evolution of the Mexican Cavefish. Amsterdam: Elsevier Inc. doi:10.1016/C2014-0-  
616 01426-8
- 617 Kowalko JE, Rohner N, Rompani SB, Peterson BK, Linden TA, Yoshizawa M, Kay EH, Weber J,  
618 Hoekstra HE, Jeffery WR, Borowsky R, Tabin CJ. 2013. Loss of schooling behavior in cavefish  
619 through sight-dependent and sight-independent mechanisms. *Curr Biol* **23**:1874–83.  
620 doi:10.1016/j.cub.2013.07.056
- 621 Krautkramer KA, Dhillon RS, Denu JM, Carey H V. 2017. Metabolic programming of the epigenome:  
622 Host and gut microbial metabolite interactions with host chromatin. *Transl Res* **189**:30–50.  
623 doi:10.1016/j.trsl.2017.08.005
- 624 Langen M, Durston S, Kas MJH, van Engeland H, Staal WG. 2011. The neurobiology of repetitive  
625 behavior: ...and men. *Neurosci Biobehav Rev* **35**:356–365. doi:10.1016/j.neubiorev.2010.02.005
- 626 Lee RWY, Corley MJ, Pang A, Arakaki G, Abbott L, Nishimoto M, Miyamoto R, Lee E, Yamamoto S,  
627 Maunakea AK, Lum-Jones A, Wong M. 2018. A modified ketogenic gluten-free diet with MCT

- 628 improves behavior in children with autism spectrum disorder. *Physiol Behav* **188**:205–211.  
629 doi:10.1016/j.physbeh.2018.02.006
- 630 Lee Y, Kang H, Jin C, Zhang Y, Kim Y, Han K. 2019. Transcriptome analyses suggest minimal effects  
631 of Shank3 dosage on directional gene expression changes in the mouse striatum. *Animal Cells Syst*  
632 (*Seoul*) **23**:270–274. doi:10.1080/19768354.2019.1595142
- 633 Li Q, Liang J, Fu N, Han Y, Qin J. 2021. A Ketogenic Diet and the Treatment of Autism Spectrum  
634 Disorder. *Front Pediatr* **9**:1–7. doi:10.3389/fped.2021.650624
- 635 Ludwig DS. 2020. The Ketogenic Diet: Evidence for Optimism but High-Quality Research Needed. *J*  
636 *Nutr* **150**:1354–1359. doi:10.1093/JN/NXZ308
- 637 Ma L, Parkhurst A, Jeffery WR. 2014. The role of a lens survival pathway including sox2 and  $\alpha$ A-  
638 crystallin in the evolution of cavefish eye degeneration. *Evodevo* **5**:28. doi:10.1186/2041-9139-5-28
- 639 Mathis A, Mamidanna P, Cury KM, Abe T, Murthy VN, Mathis MW, Bethge M. 2018. DeepLabCut:  
640 markerless pose estimation of user-defined body parts with deep learning. *Nat Neurosci* **21**:1281–  
641 1289. doi:10.1038/s41593-018-0209-y
- 642 McCue MD. 2010. Starvation physiology: Reviewing the different strategies animals use to survive a  
643 common challenge. *Comp Biochem Physiol - A Mol Integr Physiol* **156**:1–18.  
644 doi:10.1016/j.cbpa.2010.01.002
- 645 McDonald TJW, Cervenka MC. 2018. Ketogenic Diets for Adult Neurological Disorders.  
646 *Neurotherapeutics* **15**:1018–1031. doi:10.1007/s13311-018-0666-8
- 647 McGaugh SE, Gross JB, Aken B, Blin M, Borowsky R, Chalopin D, Hinaux H, Jeffery WR, Keene A,  
648 Ma L, Minx P, Murphy D, O’Quin KE, Rétaux S, Rohner N, Searle SMJ, Stahl BA, Tabin C, Volff  
649 JN, Yoshizawa M, Warren WC. 2014. The cavefish genome reveals candidate genes for eye loss.  
650 *Nat Commun* **5**:5307. doi:10.1038/ncomms6307
- 651 Meidenbauer JJ, Mukherjee P, Seyfried TN. 2015. The glucose ketone index calculator: A simple tool to  
652 monitor therapeutic efficacy for metabolic management of brain cancer. *Nutr Metab* **12**:1–7.  
653 doi:10.1186/s12986-015-0009-2
- 654 Moran D, Softley R, Warrant EJ. 2015. The energetic cost of vision and the evolution of eyeless  
655 Mexican cavefish. *Sci Adv* **1**:e1500363. doi:10.1126/sciadv.1500363
- 656 Moran D, Softley R, Warrant EJ. 2014. Eyeless Mexican cavefish save energy by eliminating the  
657 circadian rhythm in metabolism. *PLoS One* **9**:e107877. doi:10.1371/journal.pone.0107877
- 658 Nakajo H, Chou MY, Kinoshita M, Appelbaum L, Shimazaki H, Tsuboi T, Okamoto H. 2020. Hunger  
659 Potentiates the Habenular Winner Pathway for Social Conflict by Orexin-Promoted Biased  
660 Alternative Splicing of the AMPA Receptor Gene. *Cell Rep* **31**:107790.  
661 doi:10.1016/j.celrep.2020.107790
- 662 Napoli E, Dueñas N, Giulivi C. 2014. Potential therapeutic use of the ketogenic diet in autism spectrum  
663 disorders. *Front Pediatr* **2**:1–9. doi:10.3389/fped.2014.00069
- 664 O’Connell LA, Hofmann HA. 2012. Evolution of a vertebrate social decision-making network. *Science*  
665 (*80-*) **336**:1154–1157. doi:10.1126/science.1218889
- 666 O’Connell LA, Hofmann HA. 2011. Genes, hormones, and circuits: An integrative approach to study the  
667 evolution of social behavior. *Front Neuroendocrinol* **32**:320–335. doi:10.1016/j.yfrne.2010.12.004
- 668 Padilla SL, Qiu J, Soden ME, Sanz E, Nestor CC, Barker FD, Quintana A, Zweifel LS, Rønnekleiv OK,  
669 Kelly MJ, Palmiter RD. 2016. Agouti-related peptide neural circuits mediate adaptive behaviors in  
670 the starved state. *Nat Neurosci* **19**:734–741. doi:10.1038/nn.4274
- 671 Paffenhöfer G-A. 1967. Caloric content of larvae of the brine shrimp *Artemia salina*. *Helgoländer*  
672 *Wissenschaftliche Meeresuntersuchungen* **16**:130–135. doi:10.1007/BF01620694
- 673 Panda S. 2016. Circadian physiology of metabolism. *Science* (*80-*) **354**:1008–1015.  
674 doi:10.1126/science.aah4967
- 675 Patch A, Paz A, Holt K, Duboue E, Kowalko J, Keene A, Fily Y. 2020. Analysis of social swimming  
676 dynamics in the Mexican cavefish. *bioRxiv* 2020.01.31.929323. doi:10.1101/2020.01.31.929323

- 677 Pérez-Escudero A, Vicente-Page J, Hinz RC, Arganda S, De Polavieja GG. 2014. IdTracker: Tracking  
678 individuals in a group by automatic identification of unmarked animals. *Nat Methods* **11**:743–748.  
679 doi:10.1038/nmeth.2994
- 680 Phillips MCL, Murtagh DKJ, Gilbertson LJ, Asztely FJS, Lynch CDP. 2018. Low-fat versus ketogenic  
681 diet in Parkinson’s disease: A pilot randomized controlled trial. *Mov Disord* **33**:1306–1314.  
682 doi:10.1002/mds.27390
- 683 Pierre C, Pradère N, Froc C, Ornelas-García P, Callebert J, Rétaux S. 2020. A mutation in monoamine  
684 oxidase (MAO) affects the evolution of stress behavior in the blind cavefish *Astyanax mexicanus*.  
685 *bioRxiv* 2020.04.09.033266. doi:10.1101/2020.04.09.033266
- 686 Polakof S, Panserat S, Soengas JL, Moon TW. 2012. Glucose metabolism in fish: A review. *J Comp*  
687 *Physiol B Biochem Syst Environ Physiol* **182**:1015–1045. doi:10.1007/s00360-012-0658-7
- 688 Provenzano G, Corradi Z, Monsorno K, Fedrizzi T, Ricceri L, Scattoni ML, Bozzi Y. 2016.  
689 Comparative gene expression analysis of two mouse models of autism: Transcriptome profiling of  
690 the BTBR and En2<sup>-/-</sup> Hippocampus. *Front Neurosci* **10**:396. doi:10.3389/fnins.2016.00396
- 691 Qin L, Ma K, Yan Z. 2021. Rescue of histone hypoacetylation and social deficits by ketogenic diet in a  
692 *shank3* mouse model of autism. *Neuropsychopharmacology* 1–9. doi:10.1038/s41386-021-01212-1
- 693 Rajasekaran A, Venkatasubramanian G, Berk M, Debnath M. 2015. Mitochondrial dysfunction in  
694 schizophrenia: Pathways, mechanisms and implications. *Neurosci Biobehav Rev* **48**:10–21.  
695 doi:10.1016/j.neubiorev.2014.11.005
- 696 Riddle MR, Aspiras AC, Gaudenz K, Peuß R, Sung JY, Martineau B, Peavey M, Box AC, Tabin JA,  
697 McGaugh S, Borowsky R, Tabin CJ, Rohner N. 2018. Insulin resistance in cavefish as an  
698 adaptation to a nutrient-limited environment. *Nature* **555**:647–651. doi:10.1038/nature26136
- 699 Rohner N, Jarosz DFDF, Kowalko JEJE, Yoshizawa M, Jeffery WRWR, Borowsky RLRL, Lindquist S,  
700 Tabin CJCJ. 2013. Cryptic variation in morphological evolution: HSP90 as a capacitor for loss of  
701 eyes in cavefish. *Science (80- )* **342**:1372–1375. doi:10.1126/science.1240276
- 702 Runco MA, Charlop MH, Schreibman L. 1986. The occurrence of autistic children’s self-stimulation as  
703 a function of familiar versus unfamiliar stimulus conditions. *J Autism Dev Disord* **16**:31–44.  
704 doi:10.1007/BF01531576
- 705 Ruskin DN, Masino SA. 2012. The nervous system and metabolic dysregulation: Emerging evidence  
706 converges on ketogenic diet therapy. *Front Neurosci* **6**:1–12. doi:10.3389/fnins.2012.00033
- 707 Solianik R, Sujeta A, Terentjevienė A, Skurvydas A. 2016. Effect of 48 h Fasting on Autonomic  
708 Function, Brain Activity, Cognition, and Mood in Amateur Weight Lifters. *Biomed Res Int* **2016**:1–  
709 8. doi:10.1155/2016/1503956
- 710 Strickler AG, Byerly MS, Jeffery WR. 2007. Lens gene expression analysis reveals downregulation of  
711 the anti-apoptotic chaperone *alpha A-crystallin* during cavefish eye degeneration. *Dev Genes Evol*  
712 **217**:771–782.
- 713 Sumithran P, Prendergast LA, Delbridge E, Purcell K, Shulkes A, Kriketos A, Proietto J. 2013. Ketosis  
714 and appetite-mediating nutrients and hormones after weight loss. *Eur J Clin Nutr* **67**:759–764.  
715 doi:10.1038/ejcn.2013.90
- 716 Szyf M. 2015. Epigenetics, a key for unlocking complex CNS disorders? Therapeutic implications. *Eur*  
717 *Neuropsychopharmacol* **25**:682–702. doi:10.1016/j.euroneuro.2014.01.009
- 718 Vallée A, Vallée JN. 2018. Warburg effect hypothesis in autism Spectrum disorders. *Mol Brain* **11**:1–7.  
719 doi:10.1186/s13041-017-0343-6
- 720 van der Weele CM, Jeffery WR. 2022. Cavefish cope with environmental hypoxia by developing more  
721 erythrocytes and overexpression of hypoxia inducible genes. *Elife* **11**. doi:10.7554/eLife.69109
- 722 Xiong S, Wang W, Kenzior A, Olsen L, Krishnan J, Persons J, Medley K, Peuß R, Wang Y, Chen S,  
723 Zhang N, Thomas N, Miles JM, Alvarado AS, Rohner N. 2022. Enhanced lipogenesis through  
724 Ppar $\gamma$  helps cavefish adapt to food scarcity. *Curr Biol* 1–9. doi:10.1016/j.cub.2022.03.038
- 725 Yao J, Chen S, Mao Z, Cadenas E, Brinton RD. 2011. 2-deoxy-D-glucose treatment induces

- 726 ketogenesis, sustains mitochondrial function, and reduces pathology in female mouse model of  
727 Alzheimer's disease. *PLoS One* **6**. doi:10.1371/journal.pone.0021788
- 728 Yoshizawa M. 2015. Behaviors of cavefish offer insight into developmental evolution. *Mol Reprod Dev*  
729 **82**:268–280. doi:10.1002/mrd.22471
- 730 Yoshizawa M, Gorički S, Soares D, Jeffery WR. 2010. Evolution of a behavioral shift mediated by  
731 superficial neuromasts helps cavefish find food in darkness. *Curr Biol* **20**:1631–1636.  
732 doi:10.1016/j.cub.2010.07.017
- 733 Yoshizawa M, Robinson BG, Duboué ER, Masek P, Jaggard JB, O'Quin KE, Borowsky RL, Jeffery  
734 WR, Keene AC. 2015. Distinct genetic architecture underlies the emergence of sleep loss and prey-  
735 seeking behavior in the Mexican cavefish. *BMC Biol* **13**:15. doi:10.1186/s12915-015-0119-3
- 736 Yoshizawa M, Settle A, Hermosura MCM, Tuttle LJL, Cetraro N, Passow CNCN, McGaugh SESE.  
737 2018. The Evolution of a Series of Behavioral Traits is associated with Autism-Risk Genes in  
738 Cavefish. *BMC Evol Biol* **18**:89. doi:10.1186/s12862-018-1199-9
- 739 Yoshizawa M, Yamamoto Y, O'Quin KE, Jeffery WR. 2012. Evolution of an adaptive behavior and its  
740 sensory receptors promotes eye regression in blind cavefish. *BMC Biol* **10**:108. doi:10.1186/1741-  
741 7007-11-82
- 742 Zhu L, Wang X, Li XL, Towers A, Cao X, Wang P, Bowman R, Yang H, Goldstein J, Li YJ, Jiang YH.  
743 2014. Epigenetic dysregulation of SHANK3 in brain tissues from individuals with autism spectrum  
744 disorders. *Hum Mol Genet* **23**:1563–1578. doi:10.1093/hmg/ddt547
- 745  
746

747 **Figure Legends**

748 **Figure 1. Blood glucose and ketone levels under the control diet (CD) or ketogenic diet (KD).**

749 (A) Experimental procedure. After fish were raised for 3–4 months on a brine shrimp larva diet, fish  
750 were fed the CD or KD for 5 weeks. After 5 weeks, blood glucose and ketone levels were measured.  
751 (B) Blood ketone level (mmol/L). Ketone levels were significantly reduced by KD feeding in both  
752 surface fish (SF) and cavefish (CF). Data are presented as the mean  $\pm$  standard error of the mean. Dots  
753 indicate individual data. (C) Blood glucose level (mg/dL). Glucose levels were significantly reduced by  
754 KD feeding in both SF and CF. (D) The glucose ketone index (GKI) indicated that the ratio of glucose to  
755 ketone was lowered by KD feeding in both SF and CF, suggesting that this diet altered the balance  
756 between glucose and ketone.  
757 SF: N = 13 for CD feeding, N = 8 for KD feeding. CF: N = 13 for CD feeding, N = 11 for KD feeding.  
758 \*: P < 0.05, \*\*: P < 0.01, \*\*\*: P < 0.001. All detailed statistical data are available in Supplementary  
759 Table 1.

760  
761 **Figure 2. Time course of nearby interaction changes during 9 weeks of control diet (CD) or**  
762 **ketogenic diet (KD) feeding.**

763 (A) Experimental procedure. After rearing fish for 3–4 months on a brine shrimp larva diet, the pre-  
764 treatment recording was performed, followed by CD or KD feeding for 5 weeks. Nearby interactions  
765 were recorded every week until week 6 of feeding. Subsequently, all groups including KD-fed fish were  
766 given the CD until week 9. (B) An example of nearby interaction events among surface fish (SF). The  
767 left panel presents an example frame of the video. The colored lines indicate the trajectories of  
768 individual fish. A red-labeled fish was followed by a blue-labeled fish. Each nearby event that met the  
769 detection criteria, namely a distance of  $\leq 5$  cm between two fish that was maintained for more than 4 s,  
770 was counted as a nearby interaction event. The right panel presents an example of the detected events  
771 presented in a raster plot (each yellow bar indicates a nearby interaction event). Each pair of fish (six  
772 pairs among four fish) is presented in the rows. (C) Duration of nearby interactions. Although SF did not  
773 exhibit any differences in the duration of nearby interactions (s) between CD (green) and KD (blue)  
774 feeding, differences were detected among cavefish (CF) in week 5. However, the nearby interaction  
775 duration was indistinguishable from that of the CD group starting in week 6 when the KD was  
776 withdrawn from the experimental group. (D) Number of nearby interactions. Whereas SF exhibited no  
777 differences between CD and KD feeding, differences were observed in CF in weeks 4–6. After the KD  
778 was withdrawn in week 6, the number of events decreased to the level observed with CD feeding.  
779 Data are presented as the mean  $\pm$  standard error of the mean. Dots indicate individual data. N = 20 for  
780 each group. \*: P < 0.05, \*\*: P < 0.01, \*\*\*: P < 0.001. All detailed statistical data are available in  
781 Supplementary Table 1.

782  
783 **Figure 3. Ketogenic diet (KD) feeding induced surface fish (SF)-like speed profiles during nearby**  
784 **interactions in cavefish (CF).**

785 Swimming speed changes before, during, and after nearby interaction events in SF (A) and CF (B). The  
786 mean swimming speeds (i) for 4 s before the nearby interaction event, (ii) during the event, (iii) during 4  
787 s after the event, and (iv) during the out-of-event period were plotted (see the top-left inset of A). (A)  
788 Swimming speed was reduced during nearby interactions in SF in both the CD and KD groups. This  
789 profile was clearer in the fifth week (right panel). (B) Swimming speed was reduced during nearby  
790 interactions only in the KD group in week 5 (right panel). The bars indicate the 25<sup>th</sup> percentiles,  
791 medians, and 75<sup>th</sup> of the data points. Dots indicate individual data. SF: N = 11 for CD, N = 20 for KD.  
792 CF: N = 16 for CD, N = 15 for KD. \*: P < 0.05, \*\*: P < 0.01, \*\*\*: P < 0.001. All detailed statistical  
793 data are available in Supplementary Table 1.

794

795 **Supplementary Figure 1. Swimming distance of cavefish was suppressed by ketogenic diet (KD)**  
796 **feeding.**

797 Surface fish exhibited an increase in the swimming distance over time under both the control diet (CD)  
798 and KD. By contrast, in cavefish, the swimming distance and activity were suppressed by KD feeding  
799 starting in week 1, and these values remained smaller than those in CD-fed fish until week 6 when the  
800 KD was withdrawn. KD-fed cavefish subsequently exhibited an increased swimming distance (week 0).  
801 Data are presented as the mean  $\pm$  standard error of the mean. Dots indicate individual data. N = 20 in all  
802 groups. \*: P < 0.05, \*\*: P < 0.01, \*\*\*: P < 0.001. All detailed statistical data are available in  
803 Supplementary Table 1.

804  
805 **Figure 4. Biased turning was attenuated by the ketogenic diet (KD).**

806 (A) Diagram and the calculation formula for the turning bias index. The changes in the left or right  
807 traveling directions were calculated every five frames (every 0.25 s) across all trajectories and expressed  
808 as radians. Positive radian values represent left (anticlockwise) turning, and negative values indicate  
809 right turning. The ratio between the numbers of clockwise and anticlockwise turns was used as the  
810 turning rate (1 – infinity, positive value). (B) Turning biases of surface fish (left) and cavefish (right).  
811 There was no difference between CD and KD feeding in surface fish, whereas the turning index in CD-  
812 fed cavefish than in KD-fed cavefish (see week 6).

813 Data are presented as the mean  $\pm$  standard error of the mean. Dots indicate individual data. N = 20 for all  
814 groups. \*: P < 0.05, \*\*: P < 0.01, \*\*\*: P < 0.001. All detailed statistical data are available in  
815 Supplementary Table 1.

816  
817 **Supplementary Figure 2. Consistent results were obtained in the repeated experiment for the**  
818 **duration and number of nearby interactions, swimming distance, and turning bias under control**  
819 **diet (CD) or ketogenic diet (KD) feeding.**

820 (A) The duration of nearby interactions, (B) the number of nearby interactions, (C) swimming distance,  
821 and (D) turning bias are presented. The overall tendencies were the same as those observed in the  
822 original experiments (Figs. 2 and 4, Supplementary Fig. 1). Surface fish did not exhibit any significant  
823 differences regarding the duration (A) or number of nearby interactions (B), the swimming distance (C)  
824 or the turning bias (D). The duration (A) and number of nearby interactions were maintained in KD-fed  
825 cavefish, (B) whereas they were reduced in CD-fed cavefish, which also exhibited a higher level of  
826 turning bias (D). The swimming distance was not significantly reduced in KD-fed cavefish compared to  
827 that in CD-fed controls in this repeated experiment (C).

828 Data are presented as the mean  $\pm$  standard error of the mean. Dots indicate individual data. Surface fish:  
829 N = 28 for CD, N = 32 for KD. Cavefish: N = 28 for CD, N = 32 for KD. \*: P < 0.05, \*\*: P < 0.01, \*\*\*:  
830 P < 0.001. All detailed statistical data are available in Supplementary Table 1.

831  
832  
833 **Figure 5. Day and night sleeping durations and swimming distances were not altered by ketogenic**  
834 **diet (KD) feeding.**

835 (A) Sleep duration (min/h) during the day (left) and night (right). During 5 weeks of growth, the sleep  
836 duration decreased in surface fish and cavefish regardless of the diet. (B) Number of events (min/10  
837 min) during the day (left) and night (right). During 5 weeks of growth, the number of sleep events was  
838 lower in surface fish under both dietary conditions and in KD-fed cavefish. (C) Swimming distance  
839 during the day (left) and night (right). Control diet (CD)-fed cavefish exhibited a longer swimming  
840 distance during the day and night. Conversely, surface fish fed either diet and cavefish fed the KD  
841 exhibited a significantly increased swimming distance only at night.

842 Data are presented as the mean  $\pm$  standard error of the mean. Dots indicate individual data. Surface fish:  
843 N = 28 for CD, N = 32 for KD. Cavefish: N = 28 for CD, N = 32 for KD. \*: P < 0.05, \*\*: P < 0.01, \*\*\*:  
844 P < 0.001. All detailed statistical data are available in Supplementary Table 1.

845

846 **Supplementary Figure 3. Daytime and nighttime number of sleeping events under control diet**  
847 **(CD) or ketogenic diet (KD) feeding.**

848 After the 5 weeks of growth, surface fish exhibited a reduced number of sleeping events during the day  
849 under both diets. CD-fed cavefish exhibited reduced numbers of sleeping events during the day and  
850 night. However, the number of sleeping events did not differ according to the diet in cavefish or surface  
851 fish.

852 Data are presented as the mean  $\pm$  standard error of the mean. Dots indicate individual data. Surface fish:  
853 N = 28 for CD, N = 32 for KD. Cavefish: N = 28 for CD, N = 32 for KD. \*: P < 0.05, \*\*: P < 0.01, \*\*\*:  
854 P < 0.001. All detailed statistical data are available in Supplementary Table 1.

855

856 **Supplementary Figure 4. Vibration attraction behavior (VAB) and swimming distance during**  
857 **VAB under control diet (CD) or ketogenic diet (KD) feeding.**

858 (A) Number of approaches to the vibration rod in the 3-min assays. After 5 weeks of growth, the number  
859 of approaches was increased in CD- and KD-fed cavefish, but no difference according to the diet was  
860 detected in either surface fish or cavefish. (B) Swimming distance during VAB. KD-fed cavefish swam  
861 significantly shorter distances than CD-fed cavefish.

862 Data are presented as the mean  $\pm$  standard error of the mean. Dots indicate individual data. Surface fish:  
863 N = 28 for CD, N = 32 for KD. Cavefish: N = 28 for CD, N = 32 for KD. \*: P < 0.05, \*\*: P < 0.01, \*\*\*:  
864 P < 0.001. All detailed statistical data are available in Supplementary Table 1.

865

866 **Figure 6. Body length and weight under control diet (CD) or ketogenic diet (KD) feeding.**

867 (A) Standard length (cm). KD-fed surface fish and cavefish were significantly smaller than their CD-fed  
868 counterparts. (B) Body weight (g). KD-fed surface fish and cavefish weighed less than their CD-fed  
869 counterparts.

870 Data are presented as the mean  $\pm$  standard error of the mean. Dots indicate individual data. Surface fish:  
871 N = 28 for CD, N = 32 for KD. Cavefish: N = 28 for CD, N = 32 for KD. \*: P < 0.05, \*\*: P < 0.01, \*\*\*:  
872 P < 0.001. All detailed statistical data are available in Supplementary Table 1.

873

874 **Figure 7. Nearby interactions and other behaviors under control diet (CD) or beta-**  
875 **hydroxybutyrate-supplemented diet (BHB) feeding.**

876 (A) Duration of nearby interactions (s). After 4 weeks, the duration of nearby interactions was decreased  
877 in BHB-treated surface fish and increased in BHB-treated cavefish. (B) Number of nearby interactions.  
878 The number of nearby interactions was increased in BHB-treated cavefish. (C) Turning bias ratio. BHB-  
879 treated cavefish tend to exhibit decreased biased turning, although this reduction was not significant. (D)  
880 Swimming distance. No difference was detected between the CD and BHB groups.

881 Data are presented as the mean  $\pm$  standard error of the mean. Dots indicate individual data. N = 20 for all  
882 groups. \*: P < 0.05, \*\*: P < 0.01, \*\*\*: P < 0.001. All detailed statistical data are available in  
883 Supplementary Table 1.

884

885 **Supplementary Figure 5. Body size and weight under control diet (CD) or beta-hydroxybutyrate-**  
886 **supplemented diet (BHB) feeding.**

887 (A) Standard length (cm). No statistical difference was found for either diet. (B) Body weight (g). BHB-  
888 treated surface fish exhibited significantly reduced weight, whereas the weight of cavefish did not differ  
889 according to the diet.



890 Data are presented as the mean  $\pm$  standard error of the mean. Dots indicate individual data. N = 20 for all  
891 groups. \*: P < 0.05, \*\*: P < 0.01, \*\*\*: P < 0.001. All detailed statistical data are available in  
892 Supplementary Table 1.

893

894 **Supplementary Figure 6. Day and night sleeping durations and vibration attraction behavior**  
895 **(VAB) were not drastically changed by beta-hydroxybutyrate-supplemented diet (BHB) feeding.**

896 (A) Sleep duration (min/h) during the day (left) and night (right). During 4 weeks of treatment, the  
897 daytime sleep duration in surface fish and cavefish increased in BHB feeding but not in the nighttime.

898 (B) Number of approaches per the 3 min assay (VAB level). During 4 weeks of treatment, the VAB  
899 level did not shift in surface fish or cavefish regardless of diets. Data are presented as the mean  $\pm$   
900 standard error of the mean. Dots indicate individual data. N = 20 for all groups. \*: P < 0.05, \*\*: P <  
901 0.01, \*\*\*: P < 0.001. All detailed statistical data are available in Supplementary Table 1.

A

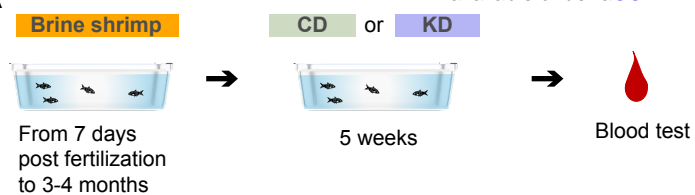

Figure 1

B

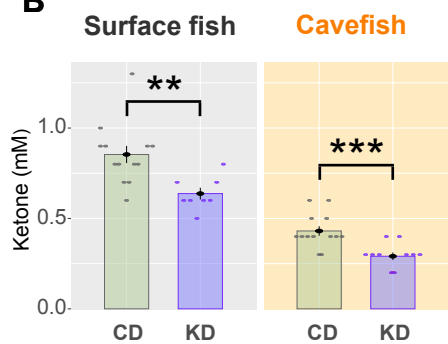

C

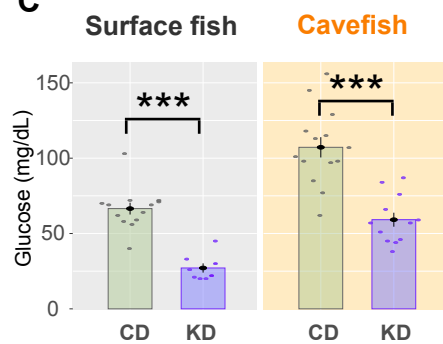

D

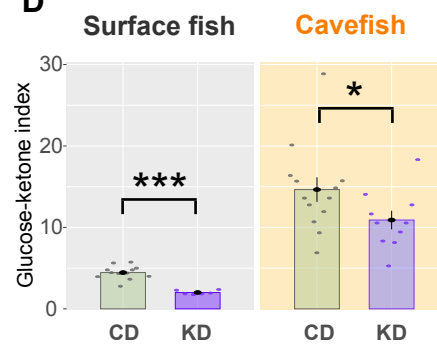

**A**

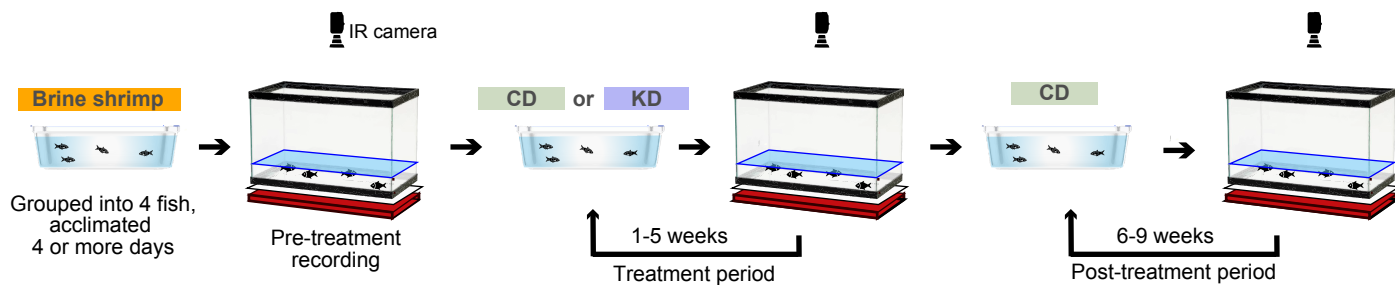

**B**

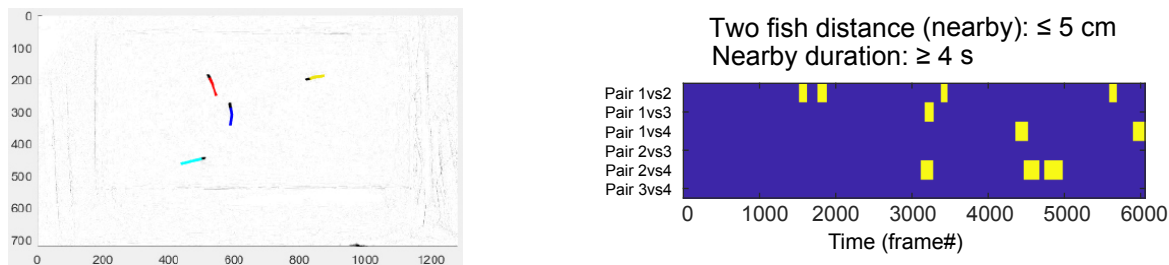

**C**

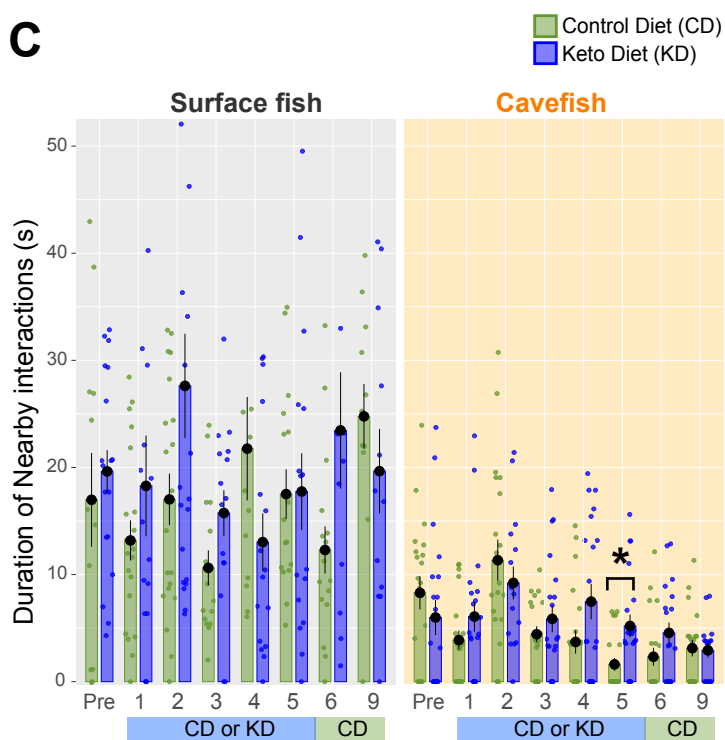

**D**

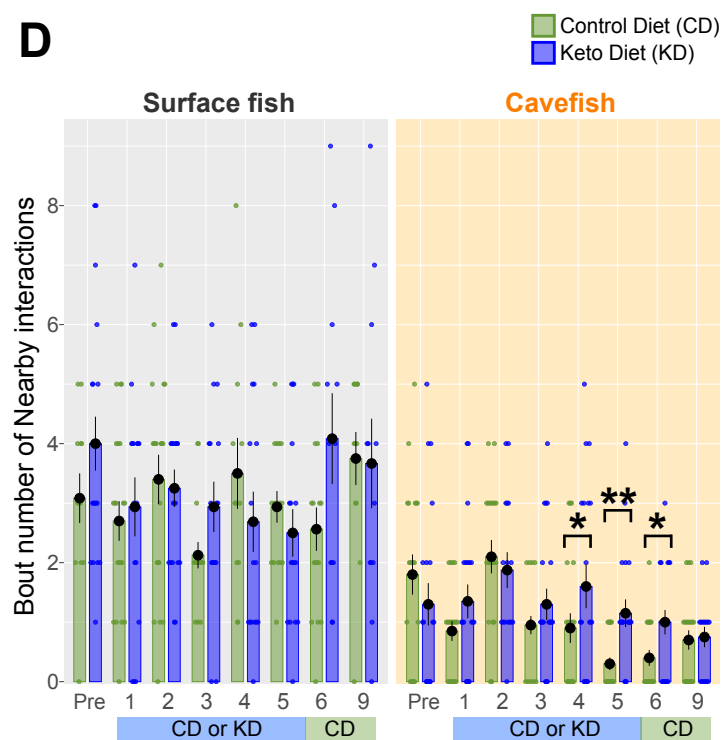

Figure 3

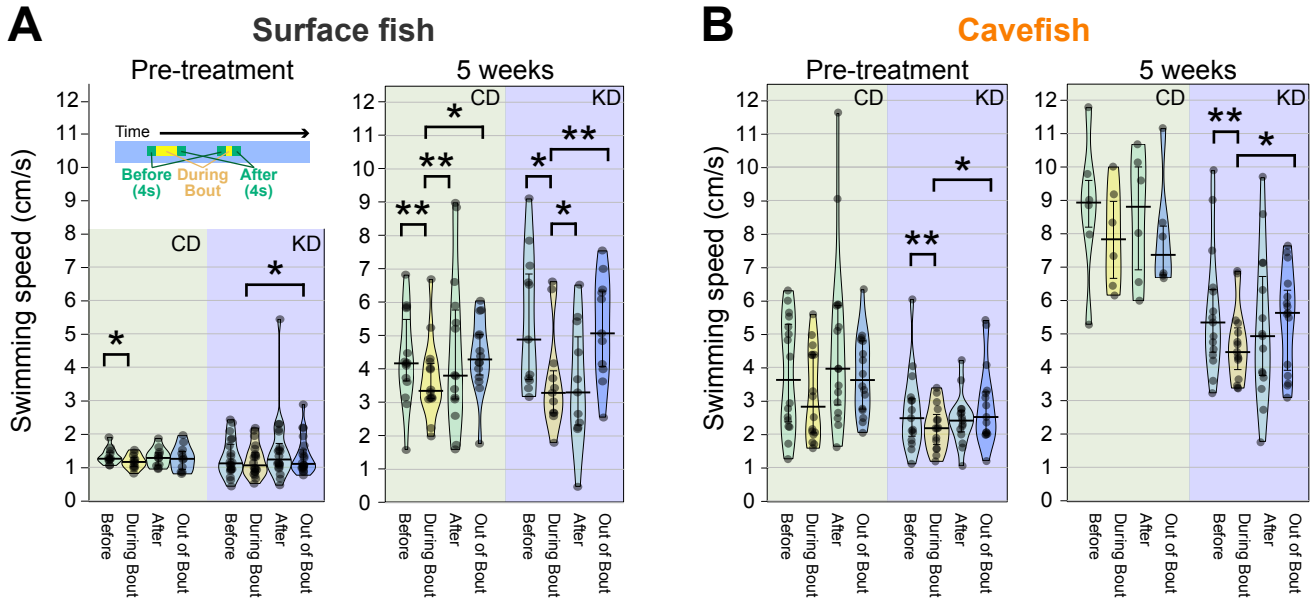

## Supplementary Figure 1

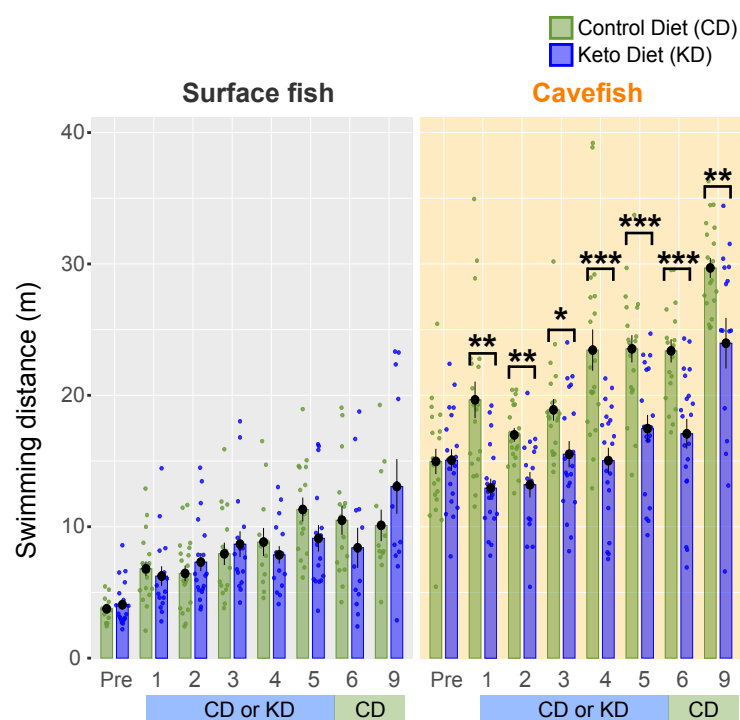

Figure 4

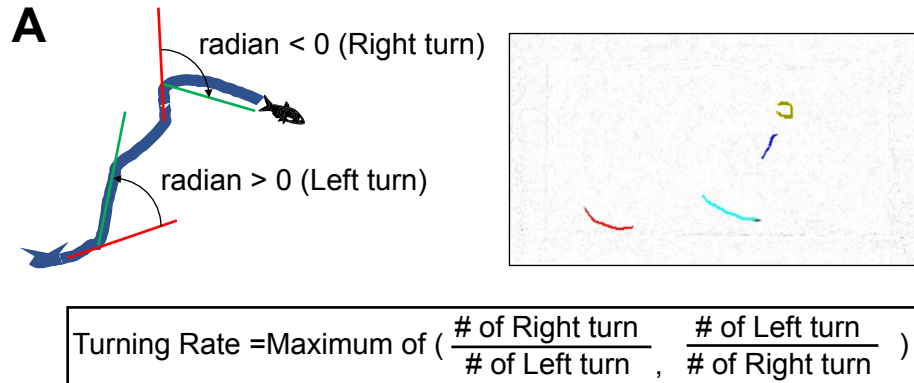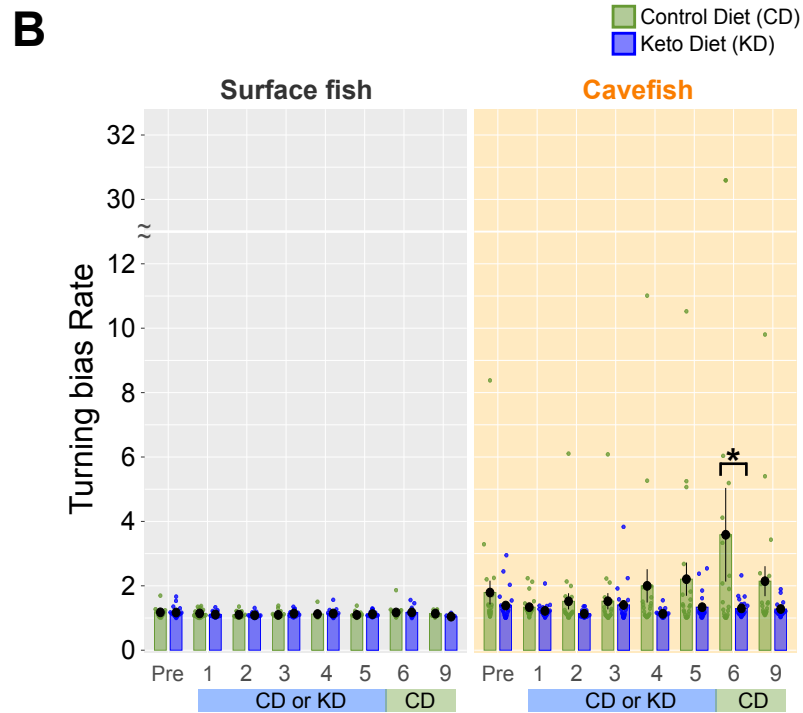

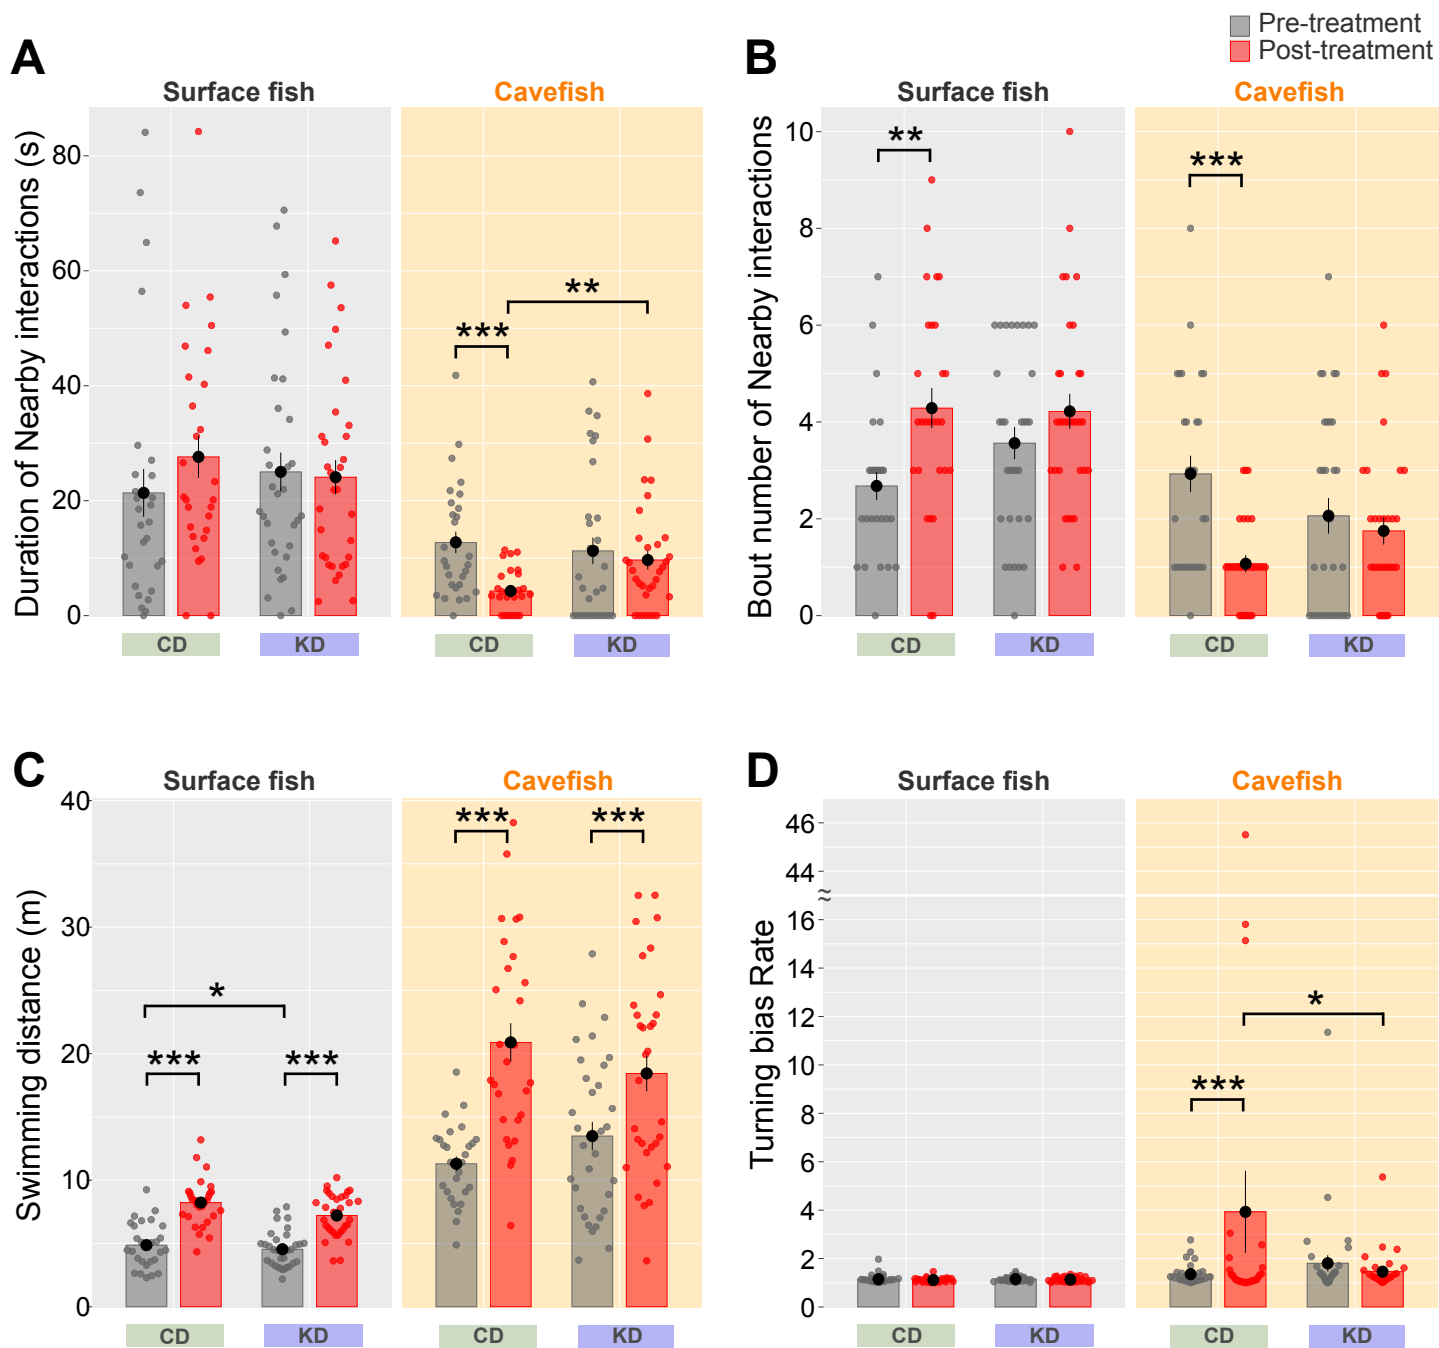

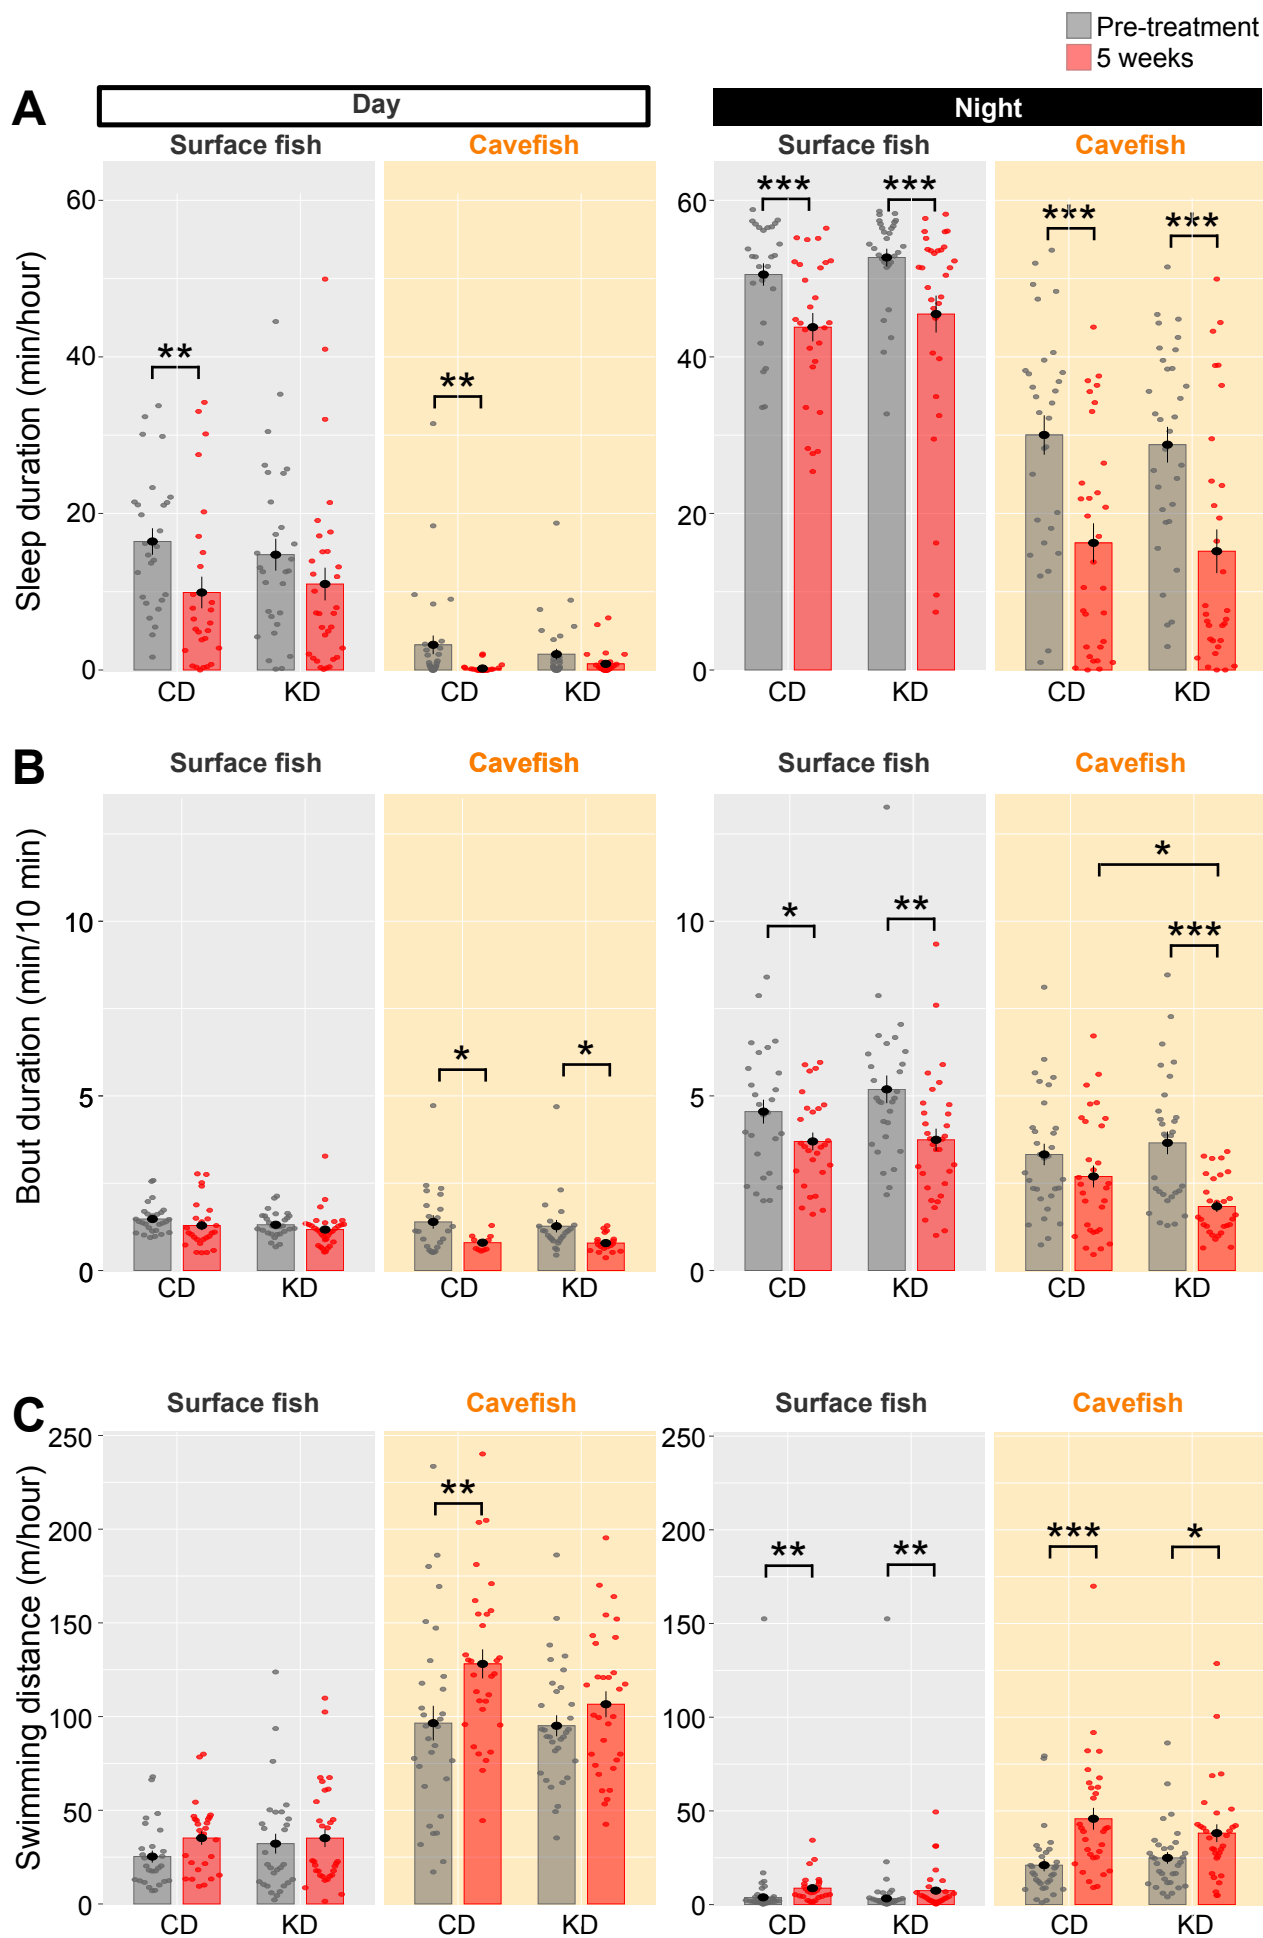



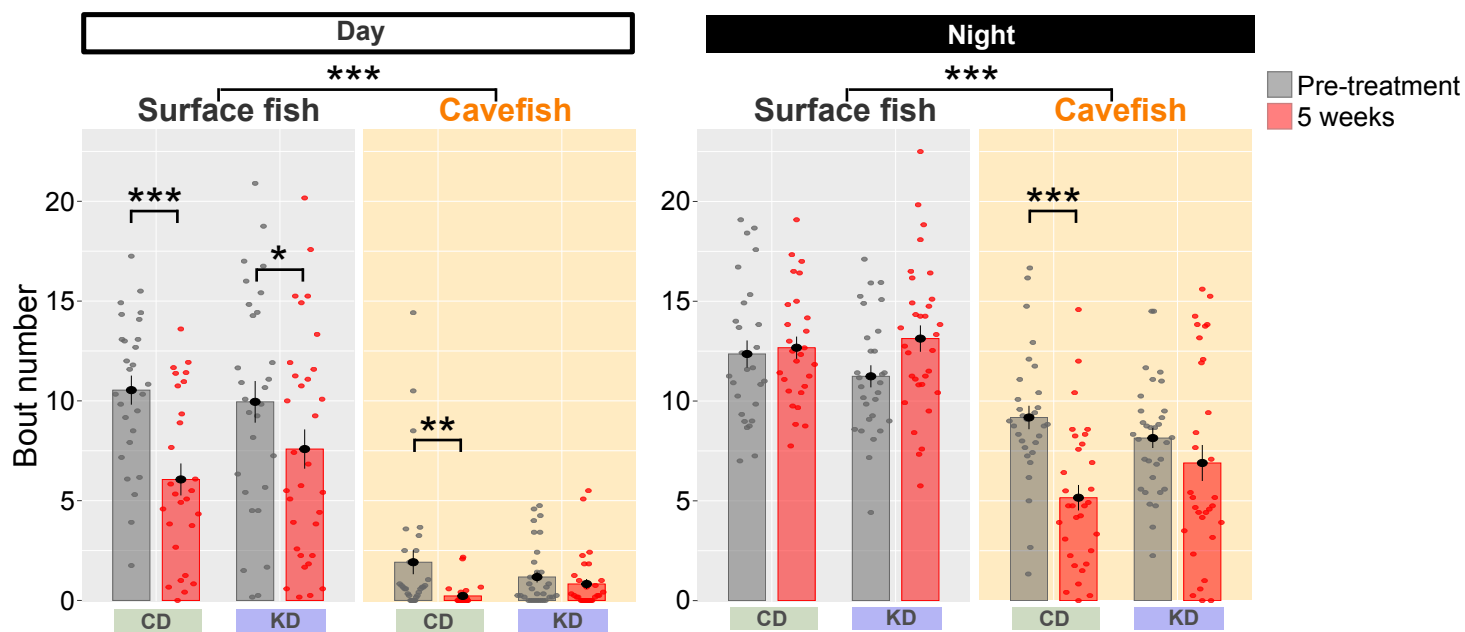

Supplementary Figure 4

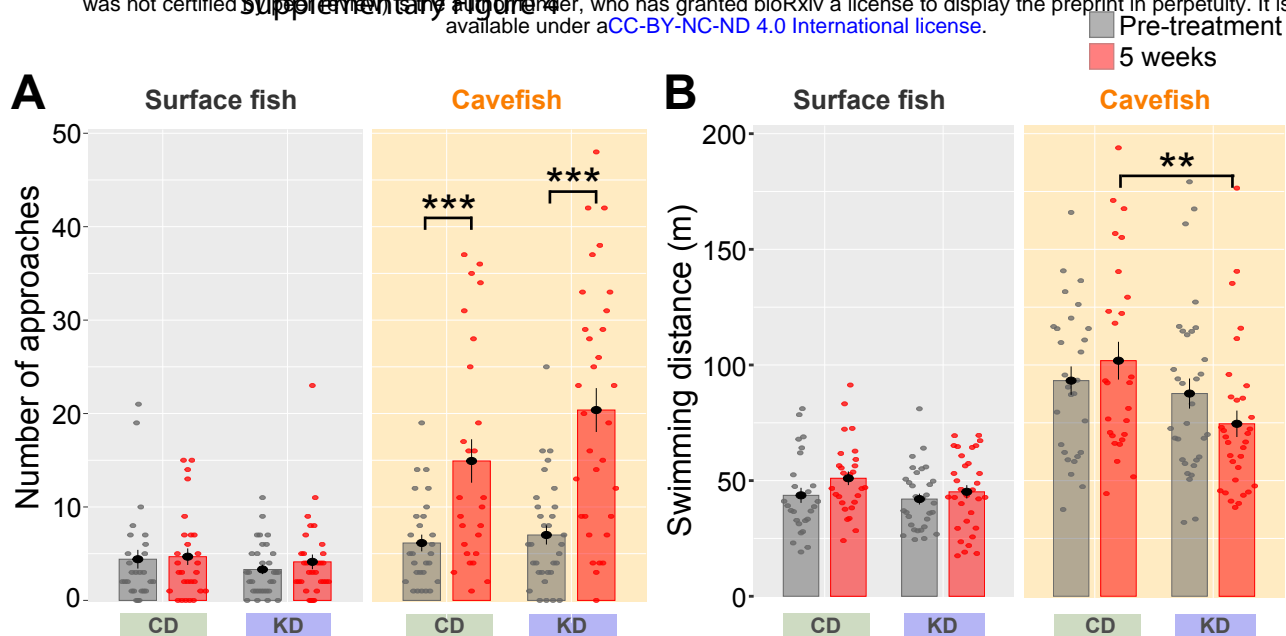

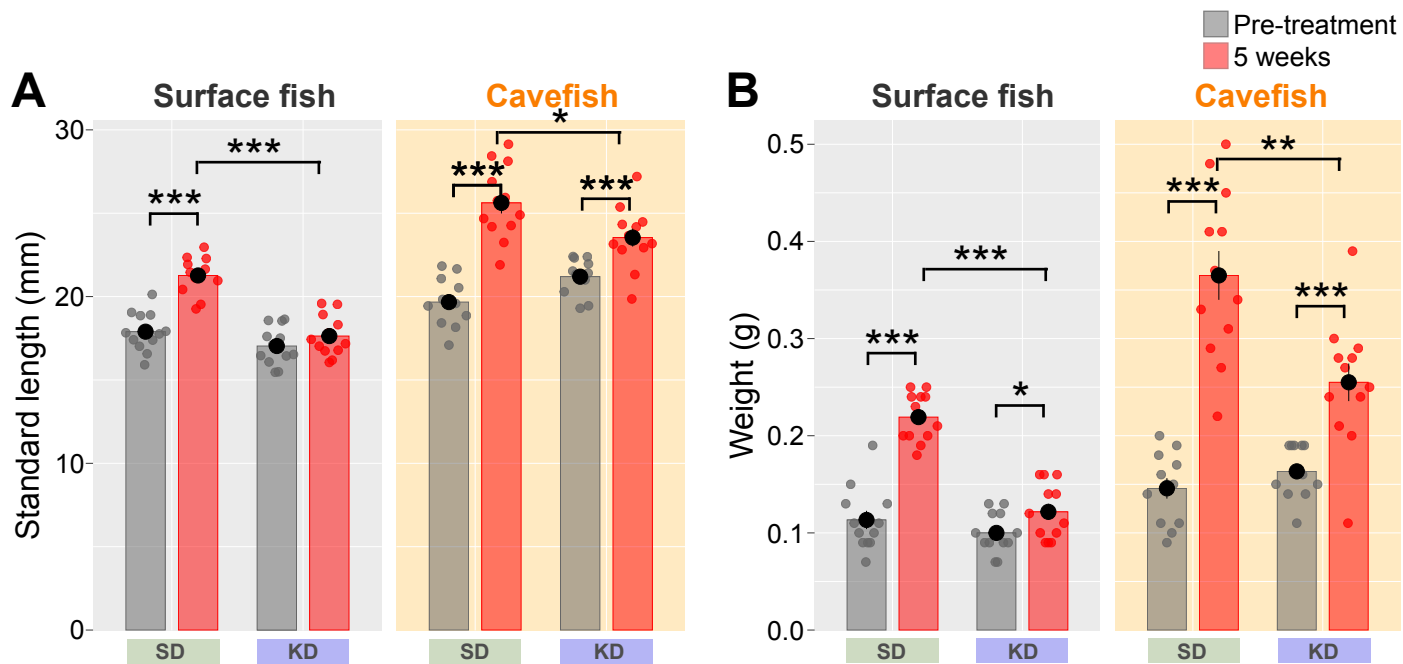

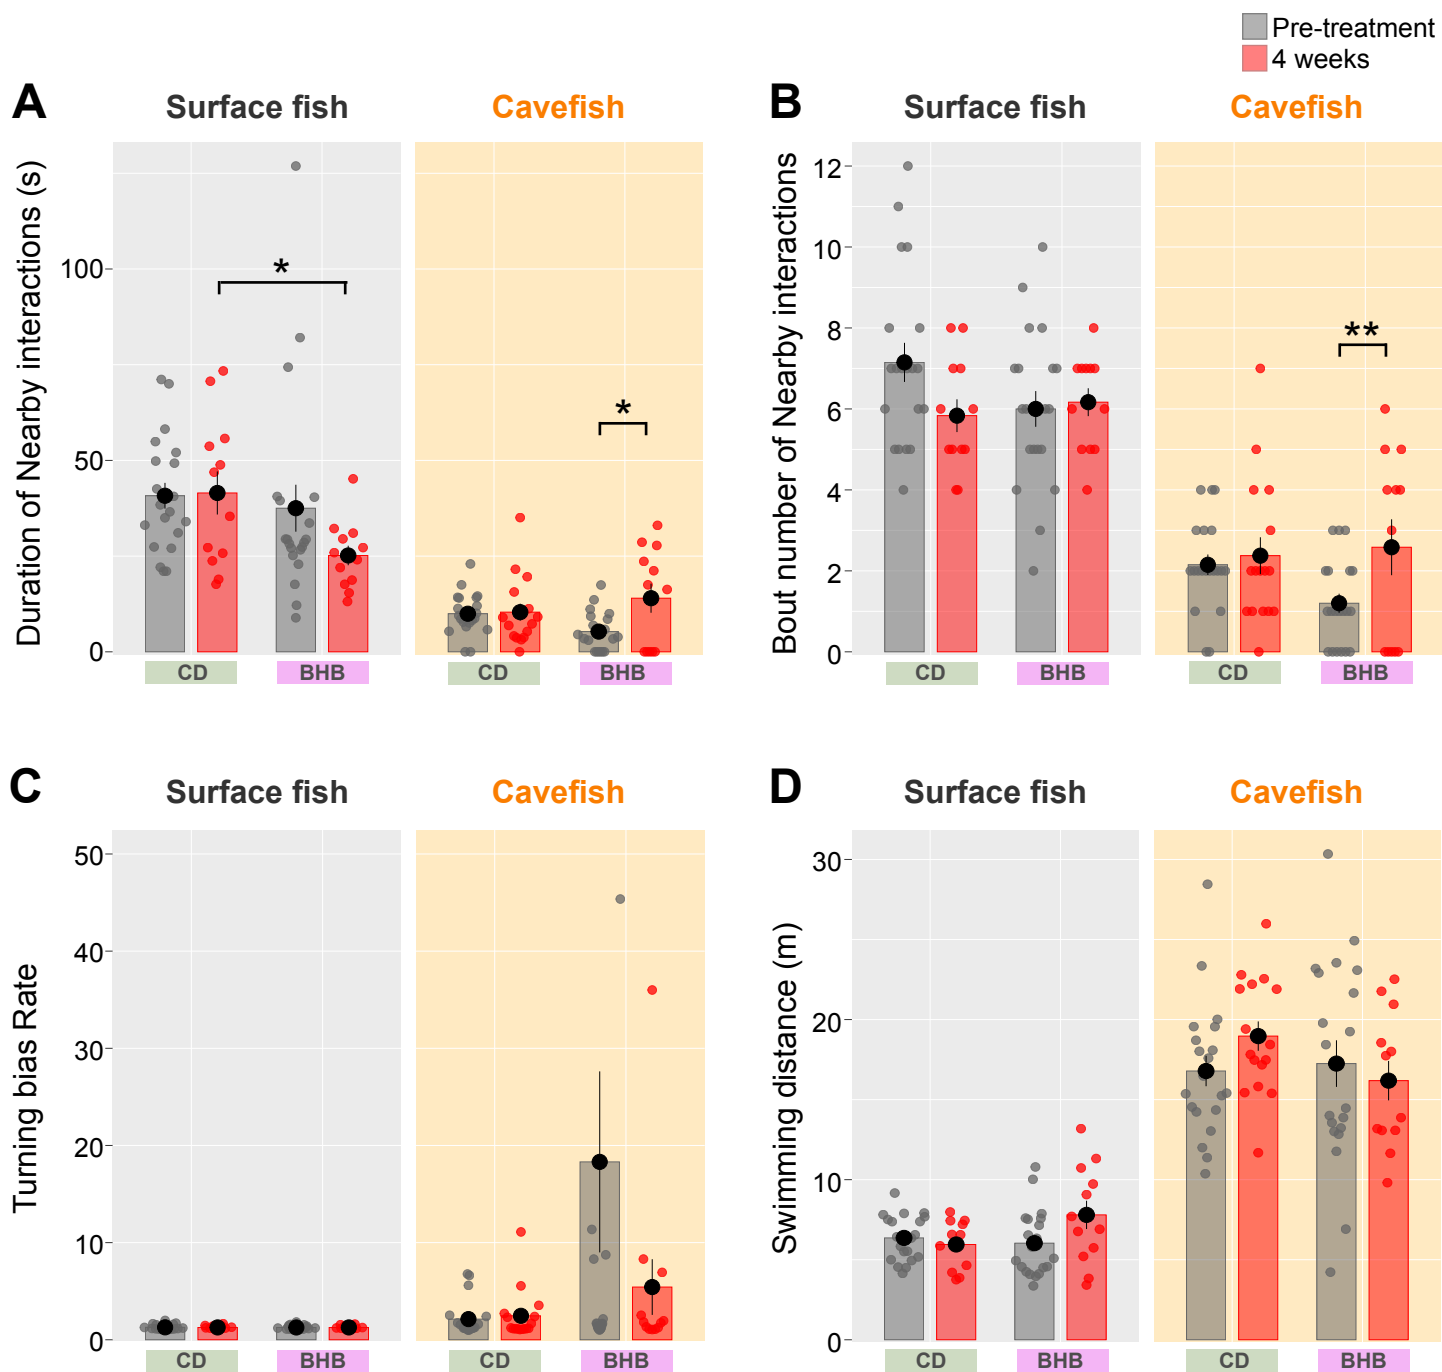

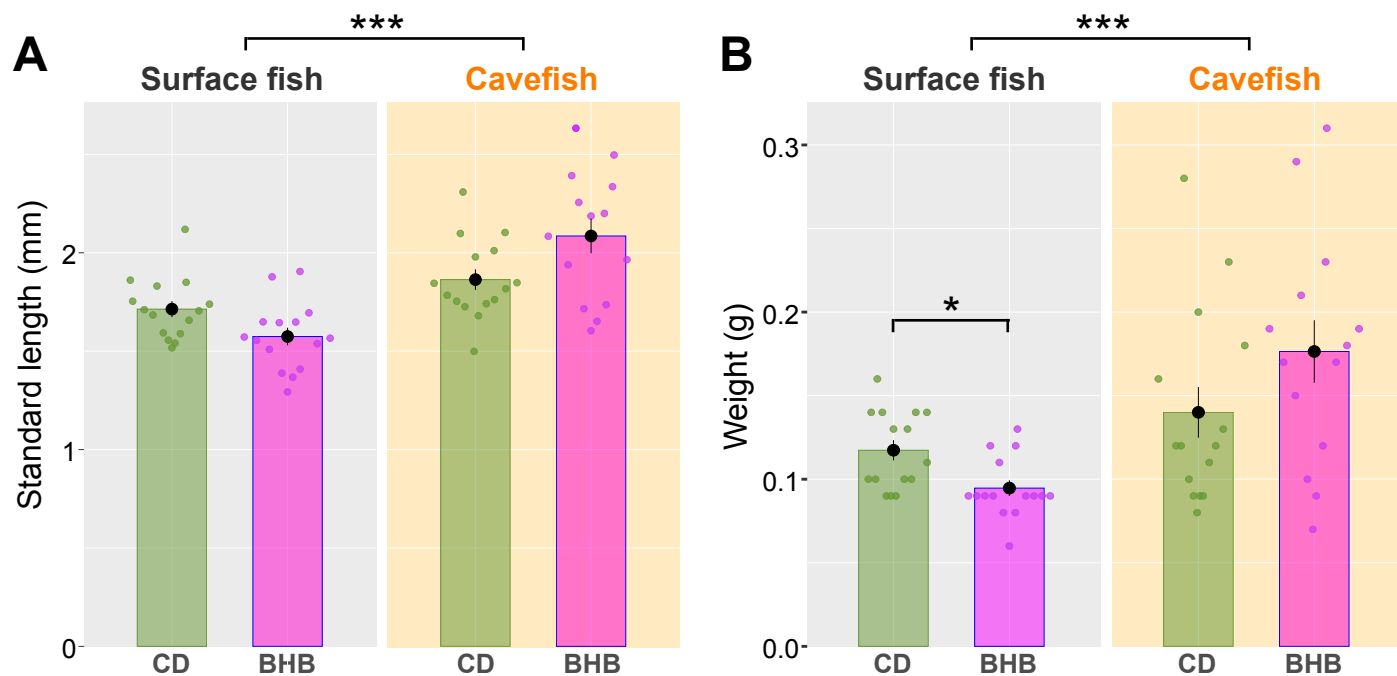

Supplementary Fig. 6

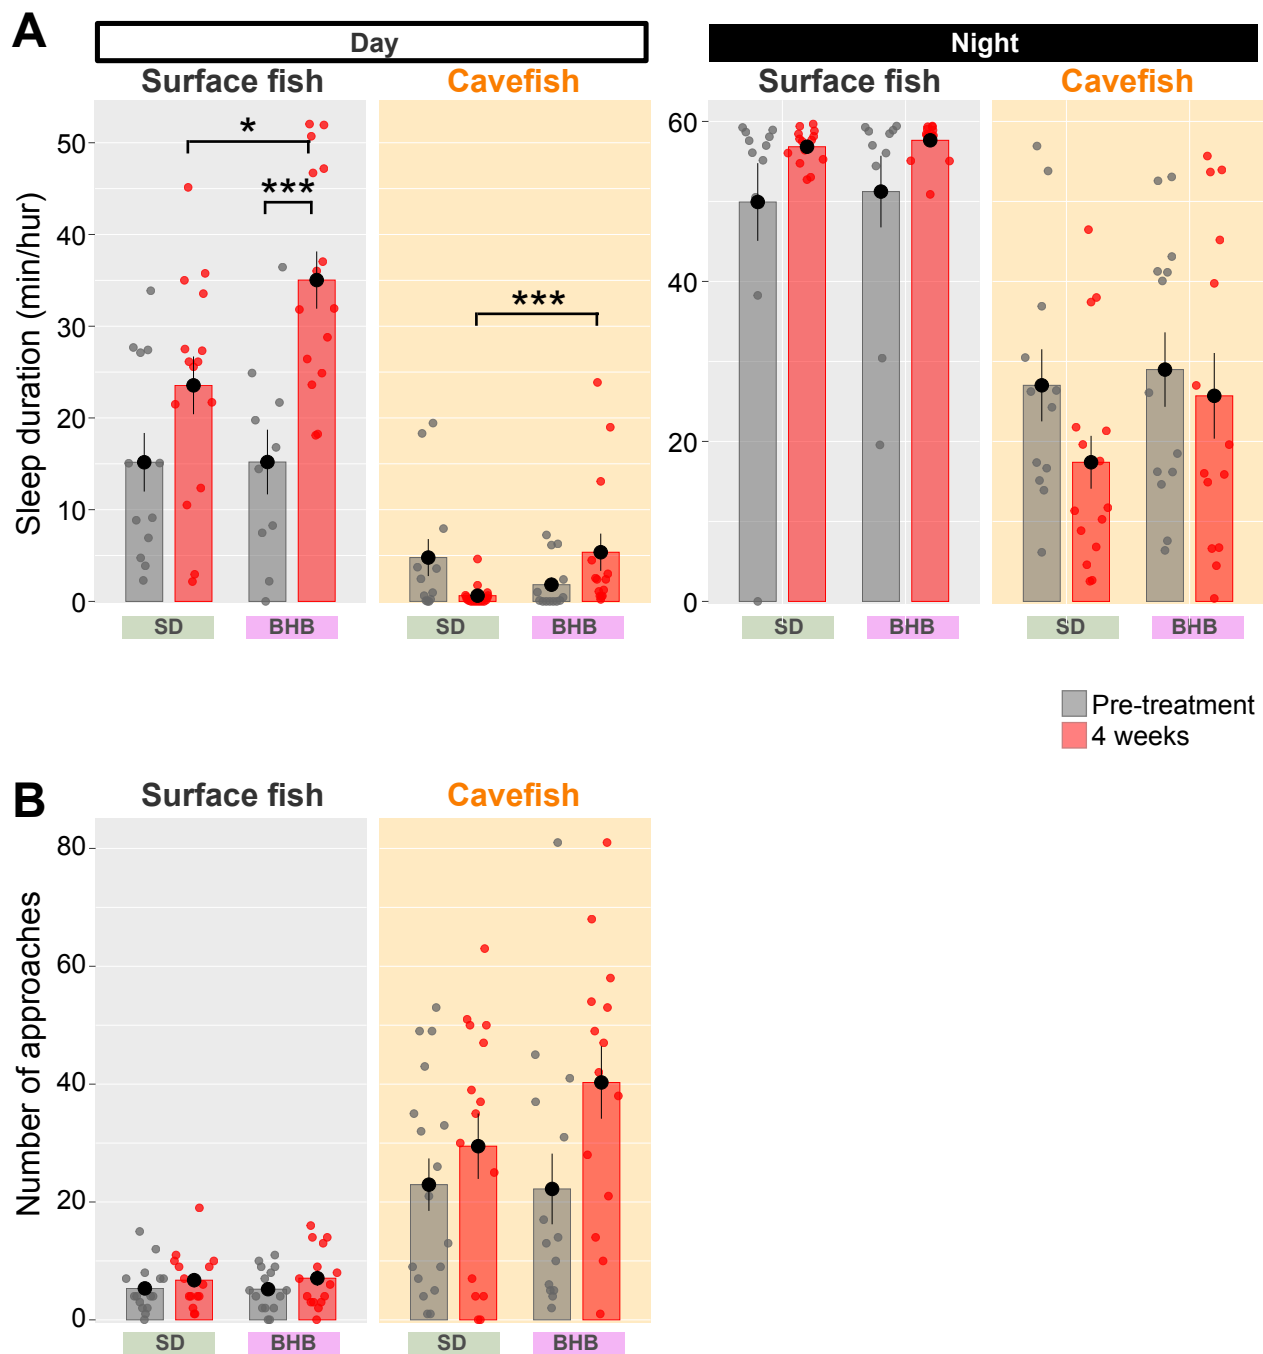

Source: https://www.biorxiv.org/content/10.1101/2022.05.20.492896v1.full.pdf
